1 **A transcription factor binding atlas for photosynthesis in cereals identifies a key role for**  
2 **coding sequence in the regulation of gene expression**

3

4 Steven J. Burgess<sup>\*1</sup>, Ivan Reyna-Llorens<sup>\*1</sup>, Katja Jaeger<sup>2</sup> and Julian M. Hibberd<sup>1</sup>

5

6 <sup>1</sup>Department of Plant Sciences, Downing Street, University of Cambridge, Cambridge CB2 3EA,  
7 UK.

8 <sup>2</sup>Sainsbury Laboratory, University of Cambridge, 47 Bateman Street, Cambridge, CB2 1LR, UK.

9

10 I-RL - [suallorens@gmail.com](mailto:suallorens@gmail.com)

11 SJB - [sjb287@cam.ac.uk](mailto:sjb287@cam.ac.uk)

12 KJ - [katja.jaeger@slcu.cam.ac.uk](mailto:katja.jaeger@slcu.cam.ac.uk)

13 JMH (corresponding) - [jmh65@cam.ac.uk](mailto:jmh65@cam.ac.uk). Tel - +44(0) 1223 766547

14

15 \*These authors contributed equally to this work

16

17

18

19

20

21

22

23

24

25

26

27

28

29 **Keywords:** Photosynthesis, gene regulation, evolution, cereals, transcription factor binding sites

30 **Summary**

31 The gene regulatory architecture associated with photosynthesis is poorly understood. Most plants  
32 use the ancestral C<sub>3</sub> pathway, but our most productive cereal crops use C<sub>4</sub> photosynthesis. In  
33 these C<sub>4</sub> cereals, large-scale alterations to gene expression allow photosynthesis to be partitioned  
34 between cell types of the leaf. Here we provide a genome-wide transcription factor binding atlas for  
35 grasses that operate either C<sub>3</sub> or C<sub>4</sub> photosynthesis. Most of the >950,000 sites bound by  
36 transcription factors are preferentially located in genic sequence rather than promoter regions, and  
37 specific families of transcription factors preferentially bind coding sequence. Cell specific patterning  
38 of gene expression in C<sub>4</sub> leaves is associated with combinatorial modifications to transcription  
39 factor binding despite broadly similar patterns of DNA accessibility between cell types. A small  
40 number of DNA motifs bound by transcription factors are conserved across 60 million years of  
41 grass evolution, and C<sub>4</sub> evolution has repeatedly co-opted at least one of these hyper-conserved  
42 *cis*-elements. The grass cistrome is highly divergent from that of the model plant *Arabidopsis*  
43 *thaliana*.

## 44 **Introduction**

45       Photosynthesis sets maximum crop yield, but despite millions of years of natural selection is not  
46 optimised for either current atmospheric conditions or agricultural practices (Long et al., 2015; Ort  
47 et al., 2015). The majority of photosynthetic organisms, including crops of global importance such  
48 as wheat, rice and potato use the C<sub>3</sub> photosynthesis pathway in which Ribulose-Bisphosphate  
49 Carboxylase Oxygenase (RuBisCO) catalyses the primary fixation of CO<sub>2</sub>. However, carboxylation  
50 by RuBisCO is competitively inhibited by oxygen binding the active site (Bowes et al., 1971). This  
51 oxygenation reaction generates toxic waste-products that are recycled by an energy-demanding  
52 series of metabolic reactions known as photorespiration (Bauwe et al., 2010; Tolbert, 1971). The  
53 ratio of oxygenation to carboxylation increases with temperature (Jordan and Ogren, 1984;  
54 Sharwood et al., 2016) and so losses from photorespiration are particularly high in the tropics.  
55 When oxygenation is reduced through CO<sub>2</sub> enrichment, crops show increased photosynthetic  
56 efficiency and higher yields (Leakey et al., 2012). In addition to the inefficiency associated with  
57 oxygenation by RuBisCO, due to the rapid rise in atmospheric CO<sub>2</sub> concentrations from ~220 to  
58 400ppm, the stoichiometry and kinetics of other photosynthesis enzymes are considered sub-  
59 optimal. For example, increased activity of Sedoheptulose 1,7-bisphosphatase improves  
60 photosynthesis and yield (Lefebvre et al., 2005; Miyagawa et al., 2001). Furthermore, the ability of  
61 leaves to harness light and generate chemical energy is neither optimised for current crop canopy  
62 structures (Zhu et al., 2010b) or rapid fluctuations in light (Kromdijk et al., 2016). Thus, although it  
63 is clear that improving C<sub>3</sub> photosynthesis would drive increased crop yields, we have an  
64 incomplete understanding of the genes that underpin this fundamental process.

65       The inefficiencies associated with C<sub>3</sub> photosynthesis in the tropics have led to multiple plant  
66 lineages evolving mechanisms that suppress oxygenation by concentrating CO<sub>2</sub> around RuBisCO.  
67 One such evolutionary strategy is known as C<sub>4</sub> photosynthesis. Species that use the C<sub>4</sub> pathway  
68 include maize, sorghum and sugarcane, and they represent the most productive crops on the  
69 planet (Sage and Zhu, 2011). In C<sub>4</sub> leaves, additional expenditure of ATP, alterations to leaf  
70 anatomy and cellular ultrastructure, as well as spatial separation of photosynthesis between  
71 compartments (Hatch, 1987) allows CO<sub>2</sub> concentration to be increased around tenfold compared  
72 with that in the atmosphere (Furbank, 2011). Despite the complexity of C<sub>4</sub> photosynthesis, it is

73 found in over 60 independent plant lineages and so represents one of the most remarkable  
74 examples of convergent evolution known to biology (Sage et al., 2011). In most C<sub>4</sub> plants the initial  
75 RuBisCO-independent fixation of CO<sub>2</sub> and the subsequent RuBisCO-dependent reactions take  
76 place in distinct cell-types known as mesophyll and bundle sheath cells, and so are associated with  
77 strict patterning of gene expression between these cell-types. Although the spatial patterning of  
78 gene expression is fundamental to C<sub>4</sub> photosynthesis, very few examples of *cis*-elements or *trans*-  
79 factors that generate cell-preferential expression required for C<sub>4</sub> photosynthesis have been  
80 identified (Brown et al., 2011; Gowik et al., 2004; Williams et al., 2016). In summary, in both C<sub>3</sub> and  
81 C<sub>4</sub> species, work has focussed on analysis of mechanisms controlling the expression of individual  
82 genes, and so our understanding of the overall landscape associated with photosynthesis gene  
83 expression is poor.

84 In yeast and animal systems, the high sensitivity of open chromatin to DNase-I (Zentner and  
85 Henikoff, 2014) has allowed comprehensive, genome-wide characterisation of transcription factor  
86 binding sites at single nucleotide resolution (Hesselberth et al., 2009; Neph et al., 2012; Thurman  
87 et al., 2012). Despite the power of this approach to define regulatory DNA and the likely  
88 transcription factors binding these sequences, this approach has not yet been used to provide  
89 insight into the regulatory architecture of photosynthetic leaves of major crops except rice (Zhang  
90 et al., 2012b). Moreover, although leaves are composed of multiple distinct cell-types, differences  
91 in transcription factor binding between cells have not yet been assessed in plants. By carrying out  
92 DNase I-SEQ on grasses that use either C<sub>3</sub> or C<sub>4</sub> photosynthesis, we provide comprehensive  
93 insight into the transcription factor binding repertoire associated with each form of photosynthesis.  
94 The data indicate that specific cell types from leaf tissue make use of a markedly distinct *cis*-  
95 regulatory code, and that transcription factor binding is more frequent within genes than promoter  
96 regions. Despite significant conservation in the transcription factors families binding DNA in  
97 grasses, it is also apparent that the binding sites they recognise are subject to high rates of  
98 mutation. Comparison of sites bound by transcription factors in both C<sub>3</sub> and C<sub>4</sub> leaves  
99 demonstrates that the repeated evolution of C<sub>4</sub> photosynthesis is built on combination of *de novo*  
100 gain of *cis*-elements and exaptation of highly conserved regulatory elements found in the ancestral  
101 C<sub>3</sub> system.



## 102 **Results**

### 103 **A *cis*-regulatory atlas for monocotyledons**

104 Four grass species were selected to provide insight into the regulatory architecture associated  
105 with C<sub>3</sub> and C<sub>4</sub> photosynthesis. *Brachypodium distachyon* uses the ancestral C<sub>3</sub> pathway (Figure  
106 1A). *Sorghum bicolor*, *Zea mays* and *Setaria italica* all use C<sub>4</sub> photosynthesis although  
107 phylogenetic reconstructions indicate that *S. italica* represents an independent evolutionary origin  
108 of the C<sub>4</sub> pathway (Figure 1A). Nuclei from leaves of *S. italica* (C<sub>4</sub>), *S. bicolor* (C<sub>4</sub>), *Z. mays* (C<sub>4</sub>)  
109 and *B. distachyon* (C<sub>3</sub>) were treated with DNase I (Figure S1) and subjected to deep sequencing. A  
110 total of 799,135,794 reads could be mapped to the respective genome sequences of these species  
111 (Table S1). 159,396 DNase-hypersensitive sites (DHS) of between 150-15,060 base pairs  
112 representing broad regulatory regions accessible to transcription factor binding were identified from  
113 all four genomes (Figure 1B). Between 20,817 and 27,746 genes were annotated as containing at  
114 least one DHS (Table S2). Within these DHS, 533,409 digital genomic footprints (DGF)  
115 corresponding to individual transcription factor binding sites of between 11 and 25 base pairs were  
116 identified through differential accumulation of reads mapping to positive or negative strands around  
117 transcription factor binding sites (Figure 1B&C). At least one transcription factor footprint was  
118 identified in >75% of the broader regions defined by DHS (Table S2). In contrast to the preferential  
119 binding of transcription factors to AT-rich DNA observed in *A. thaliana* all four grasses DGF had a  
120 greater GC content compared with the genome average (Table S3).

121 DHS and DGF were primarily located in gene-rich regions, and depleted around centromeres  
122 (Figure 1D). Individual transcription factor binding sequences were resolved in all chromosomes  
123 from each species (Figure 1D). Many genes contained DGF that have previously been associated  
124 with specific classes of transcription factors. For example, the *SbPPC* gene (Sobic.010G160700)  
125 encoding phosphoenolpyruvate carboxylase that catalyses the first committed step of C<sub>4</sub>  
126 photosynthesis, contained sixteen DGF of which six are associated with known transcription factor  
127 families (Figure 1D). On a genome-wide basis, the distribution of DGF was similar between  
128 species, with the highest proportion of such sites located in promoter, coding sequence (CDS) and  
129 intergenic regions (Figure 1E). However, when normalised to the length of such regions, the  
130 density of transcription factor recognition sites was highest in 5' untranslated regions (UTRs),

131 coding sequences (CDS) and 3' UTRs (Figure 1F). In all four species promoter regions contained  
132 fewer DGF than genic sequence (Figure 1F) and distribution plots showed that the density of DGF  
133 was highest in exonic sequences downstream of the annotated transcriptional start sites (Figure  
134 S2).

135

### 136 **A distinct *cis*-regulatory lexicon for specific cells within the leaf**

137 The above analysis provides a genome-wide overview of the *cis*-regulatory architecture  
138 associated with photosynthesis in leaves of grasses. However, as with other complex multicellular  
139 systems, leaves are composed of many specialised cell types. Because each DGF is defined by  
140 fewer sequencing reads mapping to the genome compared with the larger DHS region, depleted  
141 signals derived from low abundance cell-types cannot be detected from such tissue-level analysis  
142 (Figure 2A). Since bundle sheath strands can be separated easily (Covshoff et al., 2013) leaves of  
143 C<sub>4</sub> species provide a simple system to study transcription factor binding in specific cells (Figure  
144 2B). After bundle sheath isolation from *S. bicolor*, *S. italica* and *Z. mays* a total of 129,137 DHS  
145 were identified (Figure 2B; Table S4) containing 452,263 DGF (Figure 2B; Table S4; FDR<0.01).  
146 Of the 452,263 DGF identified in bundle sheath strands, 170,114 were statistically enriched in the  
147 bundle sheath samples compared with whole leaves (Figure 2B; Table S4). The number of these  
148 statistically enriched DGF in bundle sheath strands of C<sub>4</sub> species was large and ranged from  
149 15,880 to 85,256 in maize and *S. italica* respectively (Figure S3). Genome-wide, the number of  
150 broad regulatory regions defined by DHS in the bundle sheath that overlapped with those present  
151 in whole leaves ranged from 71 to 84% in *S. italica* and *S. bicolor* respectively (Table S5).  
152 However, only 8-23% of the narrower DGF found in the bundle sheath were also identified in whole  
153 leaves (Table S6). Taken together, these findings indicate that specific cell types of leaves share  
154 considerable similarity in the broad regions of DNA that are accessible to transcription factors, but  
155 that the short sequences actually bound by transcription factors vary dramatically.

156 To provide evidence that DGF predicted after analysis of separated bundle sheath strands are  
157 of functional importance, they were compared with previously validated *cis*-elements. In C<sub>4</sub>  
158 species, there are few such examples, but in the maize *RbcS* gene, which is preferentially  
159 expressed in bundle sheath cells, an I-box (GATAAG) is essential for light-mediated activation

160 (Giuliano et al., 1988) and a HOMO motif (CCTTTTTTCCTT) is important in driving bundle sheath  
161 expression (Xu et al., 2001) (Figure 2C). Both elements were detected in our pipeline. Interestingly,  
162 the HOMO motif was only bound in the bundle sheath strands (Figure 2C), and whilst the I-box  
163 was detected in both bundle sheath strands and whole leaves, the position of the DGF covering it  
164 was slightly shifted between the two samples (Figure 2C). Thus, orthogonal evidence for  
165 transcription factor binding in maize supports a functional role for DGF identified by DNase-SEQ in  
166 this study.

167 To investigate the relationship between cell specific gene expression and the position of DHS  
168 and DGF, the DNase-I data were compared with RNA-seq datasets from mesophyll and bundle  
169 sheath cells of C<sub>4</sub> leaves (Chang et al., 2012; Emms et al., 2016; John et al., 2014). At least three  
170 mechanisms associated with cell specific gene expression operating around individual genes were  
171 identified, and can be exemplified using three co-linear genes found on chromosome seven of *S.*  
172 *bicolor*. First, in the NADP-malate dehydrogenase (*MDH*) gene, which is highly expressed in  
173 mesophyll cells and encodes a protein of the core C<sub>4</sub> cycle (Figure S4) a broad DHS site was  
174 present in whole leaves, but not in bundle sheath strands (Figure 2D). Whilst presence of this site  
175 indicates accessibility of DNA to transcription factors that could activate expression in mesophyll  
176 cells, global analysis of all genes strongly and preferentially expressed in bundle sheath strands  
177 indicates that presence/absence of a DHS in the bundle sheath compared with the whole leaf is  
178 not sufficient to generate cell specificity (Figure S5, S6). Second, in the next contiguous gene that  
179 encodes an additional isoform of MDH that is also preferentially expressed in mesophyll cells  
180 (Figure S4) a DHS was found in both whole leaf and bundle sheath strands but DGF occupancy  
181 within this region differed between cell types (Figure 2D). Thus, despite similarity in DNA  
182 accessibility, the binding of particular transcription factors was different between cell types.  
183 However, once again, genome-wide analysis indicated that alterations to individual DGF were not  
184 sufficient to explain cell specific gene expression. For example, fewer than 30% of all enriched  
185 DGF in the bundle sheath were associated with differentially expressed genes (Table S7). Lastly,  
186 in the third gene in this region, which encodes a NAC domain transcription factor preferentially  
187 expressed in bundle sheath strands, differentially enriched DGF were associated both with regions  
188 of the gene that have similar DHS in each cell type, but also a region lacking a DHS in whole

189 leaves compared with bundle sheath strands (Figure 2D). These three classes of alteration to  
190 transcription factor accessibility and binding were detectable in genes encoding core components  
191 of the C<sub>4</sub> cycle (Figure 2E, Figure S7) implying that a complex mosaic of altered transcription factor  
192 binding mediates the cell specific expression found in the C<sub>4</sub> leaf.

193 Overall, we conclude that differences in transcription factor binding between cells is associated  
194 with both DNA accessibility defined by broad DHS, as well as fine-scale alterations to transcription  
195 factor binding defined by DGF. In addition, although bundle sheath strands possessed a distinct  
196 regulatory landscape compared with the whole leaf, we were unable to identify examples of C<sub>4</sub>  
197 genes in which individual transcription factor binding sites differed between bundle sheath and  
198 whole leaf samples. This finding implies that cell specific gene expression in C<sub>4</sub> leaves is mediated  
199 by a complex mixture of combinatorial effects mediated by alterations to gene accessibility as  
200 defined by DHS, but also changes to binding of multiple transcription factors to each C<sub>4</sub> gene.

201

## 202 **Transcription factor families associated with cell specific expression**

203 The cistrome, or set of transcription factor binding sites found in a genome, has been  
204 determined for *A. thaliana* and to date, consists of 872 experimentally verified motifs linked to 529  
205 transcription factors (O'Malley et al., 2016). Of these 872 motifs from *A. thaliana* 525 could be  
206 identified in the *Z. mays*, *S. bicolor*, *S. italica* and *B. distachyon* datasets (Figure 3A). However,  
207 within individual species fewer motifs were detected and so *de novo* prediction was used to identify  
208 sequences over-represented in DGF compared with those across the whole genome. This resulted  
209 in an additional 524 novel motifs being annotated (Figure 3A). Inspection of these motifs predicted  
210 *de novo* demonstrated clear strand bias in DNase-I cuts (Figure 3B) as would expected from *bone*  
211 *fide* transcription factor binding. By combining known and *de novo* motifs, the percentage of DGF  
212 that could be annotated in each species increased to more than 41% (Figure 3C). The relatively  
213 high number of motifs defined by transcription factor binding sites predicted *de novo* is presumably  
214 due to the significant evolutionary time since grasses diverged from *A. thaliana*.

215 To define the most common motifs actually bound by transcription factors in mature leaves  
216 undertaking C<sub>3</sub> and C<sub>4</sub> photosynthesis the frequency of individual motifs was determined and  
217 ranked from most to least common in each species. The relative ranking of motifs in the four

218 grasses was similar (Figure 3D). Visualisation of transcription factor families associated with these  
219 DGF in word clouds showed that the most prevalent motifs are associated with the AP2-EREBP  
220 and C2H2 transcription factor families (Figure 3D). These findings indicate that across these four  
221 grasses the most commonly bound transcription factor motifs are highly conserved. There was  
222 much less conservation between transcription factor binding sites in photosynthetic leaves of these  
223 monocotyledons compared with the dicotyledon *A. thaliana* (Figure 3D). This finding combined with  
224 the large number of motifs from *A. thaliana* not detected in the grasses (Figure 3A) argue for  
225 significant divergence in the cistromes of monocotyledons and dicotyledons.

226 To investigate whether particular classes of transcription factor binding motifs are associated  
227 with specific genomic features, the proportion of each motif found in promoter elements, 5' UTRs,  
228 coding regions, introns and 3' UTR sequences was defined (Figure S8). In most cases, the  
229 distribution of individual motifs was similar in all genomic features, however it was noticeable that a  
230 set of motifs was particularly common in coding sequence (Figure S8). Clustering analysis  
231 indicated that a set of 96 transcription factor motifs were strongly associated with coding  
232 sequences in all four grass species (Figure S9B, S10). The clear strand-bias indicates strong  
233 protein-DNA interaction centred on these motifs within coding sequences (Figure S9C). Sequences  
234 that carry out a dual role in both coding for amino acids and in transcription factor binding have  
235 been termed duons. Thus, in grasses it appears that duons are recognised by a specific set of  
236 transcription factors.

237 To identify regulatory factors associated with gene expression in the C<sub>4</sub> bundle sheath,  
238 transcription factor motifs located in DGF enriched in either the bundle sheath or in whole leaf  
239 samples of *S. bicolor* were identified (Figure 3E). There was little difference in the ranking of the  
240 most prevalent commonly used motifs between these cell types (Figure 3E&F). For example, the  
241 AP2-EREBP and C2H2 families were dominant in both bundle sheath and whole leaf samples,  
242 indicating that cell-specificity is not associated with large-scale changes in the relative importance  
243 of transcription factor binding. However, in terms of prevalence, a small number of transcription  
244 factor binding motifs were ranked in the top 50% in whole leaves but the bottom 50% in bundle  
245 sheath strands (Figure 3F). This finding implies that quantitative modifications to the use of

246 particular transcription factor families are associated with the spatial patterning of gene expression  
247 that is a hallmark of C<sub>4</sub> photosynthesis.

248 Further analysis revealed that in all three C<sub>4</sub> species, motifs recognised by C2C2GATA, bZIP,  
249 bHLH, BZR and TCP transcription factors were enriched in whole leaf samples, whereas those  
250 bound by ARID transcription factors were enriched in the bundle sheath (Figure 3G and Table S9).  
251 Moreover, analysis of the cell-specific transcript accumulation of members of the C2C2-GATA  
252 family, revealed one orthologue which was consistently mesophyll enriched in all three C<sub>4</sub> species  
253 (GRMZM2G379005, Seita.1G358400, Sobic.004G337500; Figure 3H). Thus, these data implicate  
254 these transcription factor families in controlling cell-specific gene expression in C<sub>4</sub> leaves, and  
255 indicate that in some cases, separate C<sub>4</sub> lineages appear to be using orthologous transcription  
256 factors to drive cell specific expression.

257

#### 258 **Transcription factor binding sites that are conserved but mobile**

259 As *B. distachyon*, *S. bicolor*, *Z. mays* and *S. italica* are thought to have diverged from a  
260 common ancestor around 60 million years ago (The International Brachypodium Initiative, 2010)  
261 they provide an opportunity to examine the extent to which the *cis*-regulatory code has diverged  
262 since that point. Furthermore, whilst the last common ancestor of *Z. mays* and *S. bicolor* was  
263 thought to use C<sub>4</sub> photosynthesis, *S. italica* belongs to a separate C<sub>4</sub> lineage (Zhang et al., 2012a).  
264 Thus, comparative analysis of these species should provide insight into the extent to which the *cis*-  
265 regulatory architecture is conserved in the grasses, and how it has been modified during the  
266 evolution of C<sub>4</sub> photosynthesis.

267 In pairwise comparisons of the four species, DGF fell into three categories: those for which  
268 homologous sequences were both present and bound by a transcription factor (conserved and  
269 occupied), those for which homologous sequences were present but were only bound by a  
270 transcription factor in one species (conserved but not occupied) and those for which no sequence  
271 homology could be found (not conserved) (Figure 4A). Only a small percentage of DGF were both  
272 conserved in sequence and bound by transcription factors (Figure 4B, Table S8). DGF that were  
273 conserved but unoccupied were the next most abundant group (Figure 4B) but the majority of DGF

274 were not conserved (Figure 4B, Table S8). These data indicate substantial turnover in the *cis*-code  
275 associated with the transcription factor binding repertoire of monocotyledons.

276 Consistent with the rapid turnover of DGF documented genome-wide (Figure 4B), the majority  
277 of  $C_4$  genes did not share DGF (Table S10 and S11). However, three genes associated with the  
278 core  $C_4$  and the Calvin-Benson-Bassham cycle that are strongly expressed in either bundle sheath  
279 or mesophyll cells contained the same *cis*-elements bound by a transcription factor in all three  $C_4$   
280 species. For example, in the 2-oxoglutarate/malate transporter (*OMT1*) gene, four sites defined by  
281 transcription factor binding were detected in all three  $C_4$  species (Figure 4C). However, the position  
282 of these sites within the gene varied in each species. In the transketolase (*TKL*) gene that is  
283 preferentially expressed in bundle sheath cells, three conserved motifs defined by transcription  
284 factor binding were detected in all  $C_4$  species, but they were also all found in the  $C_3$  species *B.*  
285 *distachyon* (Figure 4D). Thus, in some cases patterning of  $C_4$  gene expression appears linked to  
286 pre-existing regulatory architecture operating in the ancestral  $C_3$  state, but in cases where the *cis*-  
287 regulatory code associated with  $C_4$  gene expression is strongly conserved the position of these  
288 transcription factor binding sites within any gene is variable.

289

### 290 **Hyper-conserved *cis*-regulators found in coding sequences of $C_4$ genes**

291 To investigate the extent to which transcription factor binding sites associated with  $C_4$  genes  
292 within a  $C_4$  lineage are conserved, genes encoding the core  $C_4$  cycle were compared in *S. bicolor*  
293 and *Z. mays* (Figure 5A). 28 genes associated with the  $C_4$  and Calvin-Benson-Bassham Cycles  
294 contained a total of 531 DGF. Although many of these transcription factor footprints were  
295 conserved in sequence within orthologous genes, only twenty were both conserved and bound by  
296 a transcription factor (Figure 5A). These data therefore indicate that although many *cis*-elements  
297 found in orthologous genes of the  $C_4$  cycle are conserved in sequence, a small proportion were  
298 bound by a transcription factor at the time of sampling.

299 Genome-wide, the number of DGF that were conserved in sequence and bound by a  
300 transcription factor decayed in a non-linear manner with phylogenetic distance (Figure 5B). For  
301 example, *Z. mays* and *S. bicolor* shared 9,446 DGF that were both conserved and occupied. *S.*  
302 *italica* shared only 1,194 DGF with *Z. mays* and *S. bicolor* (Figure 5B). Finally, comparison of these



303 C<sub>4</sub> grasses with C<sub>3</sub> *B. distachyon* yielded 192 DGF that have been conserved over >60Myr of  
304 evolution. 95 of these highly conserved DGF were present in whole leaf samples of the C<sub>3</sub> species,  
305 but in the C<sub>4</sub> species were restricted to the bundle sheath (Figure 5B). This set of 192 ancient and  
306 highly conserved DGF were located predominantly in 5' UTRs and coding sequence and strikingly,  
307 in bundle sheath strands, over fifty percent of these hyper-conserved DGF were in coding  
308 sequence (Figure 5B).

309 One such hyper-conserved DGF is found in the *NdhM* gene that encodes a subunit of the  
310 NADH complex that preferentially assembles in bundle sheath cells of C<sub>4</sub> plants (Figure 5C) but it  
311 is not known how this evolved. In the ancestral C<sub>3</sub> state a hyper-conserved DGF is found in whole  
312 leaves of *B. distachyon* (Figure 5D). However, in all three C<sub>4</sub> species rather than this DGF being  
313 detected in whole leaf material, it is detected in the bundle sheath. It is also noticeable that this  
314 motif has proliferated within the gene in the C<sub>4</sub> species compared with C<sub>3</sub> *B. distachyon*, and in  
315 maize and sorghum is also found in the 5' UTR as well as coding sequence. Furthermore, in whole  
316 leaf samples of these C<sub>4</sub> species, transcription factor binding is shifted upstream or downstream  
317 (Figure 5D). We therefore propose that preferential expression of *NdhM* in the bundle sheath is  
318 built upon a *cis*-regulator present in the C<sub>3</sub> state that activates expression in all photosynthetic cells  
319 of the leaf. During the evolution of C<sub>4</sub> photosynthesis, whilst accessibility of this ancient and highly  
320 conserved *cis*-element is maintained in the bundle sheath to allow expression of *NdhM*, in  
321 mesophyll cells an additional transcription factor(s) binds flanking sequence that blocks access to  
322 this pre-existing architecture. These findings are consistent with hyper-conserved DGF located in  
323 coding sequence playing an important role in the cell specific gene expression required in leaves of  
324 C<sub>4</sub> grasses.

325 As genome-wide analysis indicated that a specific group of DGF was associated with coding  
326 sequence (Figure S8-S10) we investigated whether motifs associated with the 192 hyper-  
327 conserved DGF found in all four grasses were over-represented in this set. Remarkably, of the 96  
328 families of transcription factors strongly associated with binding motifs in coding sequence (Figure  
329 S10), 47 and 55 were hyper-conserved in the whole leaf and bundle sheath respectively and the  
330 ERF family was particularly common (Figure S11, S12). Overall, these data indicate that in these  
331 grasses specific families of transcription factors are particularly important in binding coding



332 sequences, and that the duons bound by these transcription factors are highly conserved across  
333 deep evolutionary time.  
334

## 335 **Discussion**

### 336 **Genome-wide transcription factor binding in grasses**

337 The data presented here provide insight into genome-wide binding of transcription factors in  
338 photosynthetic tissue, but also maize and sorghum which represent two of the world's most  
339 productive crops. This transcription factor binding landscape shows both similarities and  
340 differences with other eukaryotic systems. For example, in contrast with *A. thaliana* in which AT-  
341 rich DNA is preferentially bound, the grasses showed preferential binding of transcription factors to  
342 GC-rich DNA. Preference for GC-rich DNA has also been observed in humans (Wang et al., 2012)  
343 and so the differences in binding likely reflect the relative proportion of nucleotides in each  
344 genome. In all these eukaryotes, individual genes are bound by a complex mosaic of transcription  
345 factors distributed across major genic feature including promoter regions, UTRs and coding  
346 sequence. However, in grasses this standard architecture exemplified by yeast, animals and *A.*  
347 *thaliana* appears to have been modified such that a much higher proportion of transcription  
348 factor footprints are located in exonic and coding regions. For example, in human cells ~3% of  
349 transcription factor binding sites are exonic (Stergachis et al., 2013). In contrast, in grass leaves  
350 studied here up to 36% and 25% of transcription factor binding sites were located in exonic and  
351 coding sequence respectively. This finding is supported by the following observations. First, within  
352 individual genes the distribution of transcription factor binding sites peaked after the predicted  
353 transcriptional start site. Second, in grasses, strong and reproducible expression of transgenes is  
354 routinely achieved by fusing 5' exon and intron sequence to the promoter of interest (Cornejo et al.,  
355 1993; Jeon et al., 2000; Maas et al., 1991). Third, although the functional importance of  
356 transcription factor binding to coding sequences has been debated in animals (Xing and He, 2015),  
357 in grasses these motifs are bound by specific families of transcription factors, and so it is not the  
358 case that all transcription factors contribute to this non-random distribution. Moreover, in plants  
359 functional analysis has now indicated that duons can control the patterning of gene expression  
360 (Reyna-Llorens et al., 2016). Although it is unclear why transcription factor binding in grasses  
361 should be particularly prevalent in 5' UTR and coding sequences, these findings combined with the  
362 available literature argue for duons and the cognate transcription factors that bind them being of  
363 pervasive importance in grass genomes.

364

## 365 **The transcription factor landscape underpinning gene expression in specific cell types**

366 Given the central importance of cellular compartmentation to C<sub>4</sub> photosynthesis, there have  
367 been significant efforts to identify *cis*-elements that restrict gene expression to either mesophyll or  
368 bundle sheath cells of C<sub>4</sub> leaves (Hibberd and Covshoff, 2010; Sheen, 1999; Wang et al., 2014).  
369 Along with many other systems, initial analysis focussed on regulatory elements located in  
370 promoters of C<sub>4</sub> genes (Sheen, 1999) but, it has become increasingly apparent that the patterning  
371 of gene expression between cells in the C<sub>4</sub> leaf can be mediated by elements in various parts of a  
372 gene. This includes untranslated regions (Kajala et al., 2011; Patel et al., 2004; Viret et al., 1994;  
373 Williams et al., 2016; Xu et al., 2001) and coding sequences (Brown et al., 2011; Reyna-Llorens et  
374 al., 2016). The genome-wide data reported here provides an unbiased insight into where  
375 transcription factors bind C<sub>4</sub> genes, and along with the rest of the genome, indicate that binding is  
376 most dense in the 5' UTRs and coding exons.

377 Mechanistically, this DNaseI dataset also indicates that cell specific gene expression in C<sub>4</sub>  
378 leaves is not strongly correlated with changes to large-scale accessibility of DNA as defined by  
379 DHS. This strongly implies that modifications to chromatin density within any one gene do not  
380 impact on its expression between cell types. Rather, as only 8-24% of transcription factor binding  
381 sites detected in the bundle sheath were also found in whole leaves, the data strongly implicate  
382 complex modifications to patterns of transcription factor binding in controlling gene expression  
383 between cell types. These findings are consistent with analogous analysis in roots where genes  
384 with clear spatial patterns of expression are bound by multiple transcription factors (Sparks et al.,  
385 2016) and highly combinatorial interactions between multiple activators and repressors tune the  
386 output (de Lucas et al., 2016). However, it is also the case that particular classes of transcription  
387 factors including the C2C2GATA, bZIP, bHLH and ARID families are implicated in patterning of  
388 gene expression because they were preferentially detected as binding their cognate *cis*-elements  
389 in either bundle sheath strands or whole leaves. Our findings therefore strongly imply that the  
390 spatial patterning of gene expression in leaves is mediated by a quantitative switch in the  
391 abundance of a group of transcription factors.

392 More generally, the finding that so few transcription factor binding sites were shared between  
393 different cell types in leaves of *S. bicolor*, *Z. mays* and *S. italica* argues strongly for the need to  
394 isolate these cells when attempting to understand the control of gene expression. Although  
395 separating bundle sheath strands from C<sub>4</sub> leaves is relatively trivial (Covshoff et al., 2013; Furbank  
396 et al., 1985; Leegood, 1985) this is not the case for C<sub>3</sub> leaves. Approaches in which nuclei from  
397 specific cell-types are labelled with an exogenous tag (Deal and Henikoff, 2011) should now allow  
398 their transcription factor landscapes to be defined. In the future, the application of DNase I-SEQ to  
399 specific cell types from both C<sub>3</sub> and C<sub>4</sub> leaves should provide insight into how the extent to which  
400 gene regulatory networks have been re-wired during the evolution of the complex C<sub>4</sub> trait.

401

#### 402 **Characteristics of the transcription factor repertoire facilitating evolution of the C<sub>4</sub> pathway**

403 Comparison of transcription factor binding in the C<sub>3</sub> grass *B. distachyon* with three C<sub>4</sub> species  
404 provides insight into mechanisms associated with the evolution of C<sub>4</sub> photosynthesis. One striking  
405 finding was that in all four species, irrespective of whether they used C<sub>3</sub> or C<sub>4</sub> photosynthesis, the  
406 most abundant DNA motifs bound by transcription factors were similar. Thus, motifs recognised by  
407 the AP2EREBP, C2C2 and C2C2DOF classes of transcription factor were most commonly bound  
408 across each genome. This indicates that during the evolution of C<sub>4</sub> photosynthesis, there has been  
409 relatively little alteration to the most abundant classes of transcription factors that bind DNA.

410 The repeated evolution of the C<sub>4</sub> pathway has frequently been associated with convergent  
411 evolution (Sage, 2004; Sage et al., 2012). However, parallel alterations to amino acid and  
412 nucleotide sequence that allow altered kinetics of the C<sub>4</sub> enzymes (Christin et al., 2014, 2007) and  
413 patterning of C<sub>4</sub> gene expression (Brown et al., 2011) respectively have also been reported. The  
414 genome-wide analysis of transcription factor binding now indicates that parallel evolution of  
415 transcription factors has contributed to the repeated appearance of C<sub>4</sub> photosynthesis. This is best  
416 exemplified by the fact that in the three C<sub>4</sub> species that are derived from two independent C<sub>4</sub>  
417 lineages, motifs bound by the ARID and C2C2GATA classes of transcription factor were enriched  
418 in bundle sheath and whole leaves respectively. In the case of the C2C2GATA family, transcripts  
419 derived from one specific orthologue were more abundant in mesophyll cells of all C<sub>4</sub> species.  
420 Thus, within separate lineages of C<sub>4</sub> plant, the same classes of transcription factors have been

421 recruited into functioning preferentially in one cell type, and in the case of the C2C2GATA family  
422 this is associated with orthologous genes being preferentially expressed in mesophyll cells.

423 When orthologous genes were compared between genomes the majority of transcription factor  
424 binding sites were not conserved. Furthermore, of the DGF that were conserved, we found that  
425 their position within orthologous genes varied. This indicates that C<sub>4</sub> photosynthesis in grasses is  
426 tolerating both a rapid turnover of the *cis*-code, and that when motifs are conserved in sequence,  
427 their position and number within a gene can vary. It therefore appears that the cell-specific  
428 accumulation patterns of C<sub>4</sub> proteins can be maintained despite considerable modifications to the  
429 cistrome of C<sub>4</sub> leaves. This finding is analogous to the situation in yeast where the output of  
430 genetic circuits can be maintained despite rapid turnover of regulatory mechanisms underpinning  
431 them (Tsong et al., 2006). It was also the case that some conserved motifs bound by transcription  
432 factors in the C<sub>4</sub> species were present in *B. distachyon*, which uses the ancestral C<sub>3</sub> pathway.  
433 Previous work has shown that *cis*-elements used in C<sub>4</sub> photosynthesis can be found in orthologous  
434 genes from C<sub>3</sub> species (Reyna-Llorens et al., 2016; Williams et al., 2016). However, these previous  
435 studies identified *cis*-elements that were conserved in both sequence and position. As it is now  
436 clear that such conserved sites are mobile within a gene, it seems likely that many more examples  
437 of ancient *cis*-elements important in C<sub>4</sub> photosynthesis will be found in C<sub>3</sub> plants.

438 Although we were able to detect a small number of transcription factor binding sites that were  
439 conserved and occupied in all four species that were sampled, these ancient hyper-conserved  
440 motifs appear to have played a role in the evolution of C<sub>4</sub> photosynthesis. Interestingly, a large  
441 proportion of these motifs bound by transcription factors are found in coding sequence, and this  
442 bias was particularly noticeable in bundle sheath cells. Due to the amino acid code, the rate of  
443 mutation of coding sequence compared with the genome is restricted. If such regions have a  
444 longer half-life than transcription factor binding sites in other regions of the genome, then they may  
445 represent an excellent source of raw material for the repeated evolution of complex traits (Martin  
446 and Orgogozo, 2013). It remains to be determined why this characteristic is particularly noticeable  
447 in bundle sheath cells of C<sub>4</sub> leaves.

448 In summary, the data presented here provides a transcription factor binding atlas for leaves of  
449 grasses using either C<sub>3</sub> or C<sub>4</sub> photosynthesis. Surprisingly, many sequences bound by transcription

450 factors are found within genes rather than promoter regions. Indeed, particular transcription factor  
451 families preferentially bind coding sequence and the motifs that they bind are highly conserved in  
452 the grasses. Moreover, the canonical patterning of gene expression in C<sub>4</sub> leaves is underpinned by  
453 complex combinatorial modifications to transcription factor binding. Lastly, consistent with the deep  
454 evolutionary time associated with the divergence of the monocotyledons and dicotyledons, the  
455 cistrome of grasses is highly divergent from that of the model plant *Arabidopsis thaliana*.

456 **Figure Legends:**

457 **Figure 1: Transcription factor binding atlas for whole leaf samples of four grasses. (A)**

458 Schematic of phylogenetic relationship between species analysed. The two independent origins of  
459 C<sub>4</sub> photosynthesis are highlighted with black and white circles. (B) Summary of sampling and the  
460 total number of DNase I-hypersensitive sites (DHS) and Digital Genomic Footprints (DGF)  
461 identified across all four species. (C) TreeView diagrams illustrating cut density around individual  
462 digital genomic footprint (DGF). Each row represents an individual DGF, cuts are coloured  
463 according to whether they align to the positive (red) or negative (blue) strand and indicate  
464 increased cutting in a 50 bp window on either side of the DGF. The total number of DGF per  
465 sample is shown at the bottom. (D) Representation of DNase I-SEQ data from *S. bicolor*, depicting  
466 gene (grey), DHS (light blue), DGF (orange) and DNase-I cut density (dark blue) at five scales:  
467 genome wide, with chromosome number and position indicated (top), chromosomal (second level),  
468 kb genomic region (third level), individual *PPC* gene (fourth level) and individual transcription factor  
469 binding sites (fifth level). Between each level the expanded area is illustrated. (E) Pie-chart  
470 representing the distribution of DGF among genomic features. Promoters are defined as 3000  
471 base pairs (bp) upstream the transcriptional start site while downstream and intergenic features  
472 represent regions 1000 and >1000bp downstream of the transcription termination site respectively.  
473 (F) Density of DGF per kb in each genomic feature.

474

475 **Figure 2: Characterisation of the DNA binding landscape in the C<sub>4</sub> Bundle Sheath. (A)**

476 Schematic showing that footprints associated with low abundance cells such as the Bundle Sheath  
477 (BS) may not be detected from whole leaf (WL) samples. (B) Bundle sheath isolation for DNase I-  
478 SEQ experiments, with phylogeny (left) and workflow (right). (C) DGF identified in the maize  
479 *ZmRBCS3* gene coincide with I- and HOMO-boxes known to regulate gene expression. The gene  
480 model is annotated with whole leaf (blue) and BS (orange) DGF, and the I- and HOMO-boxes are  
481 indicated below. (D) Co-linear genes from *S. bicolor* depicting three classes in alterations to DNA  
482 accessibility and transcription factor binding to genes that are differentially expressed between  
483 whole leaf (blue) and bundle sheath (orange). The C<sub>4</sub> *MDH* contains a DHS and consequently  
484 DGF only in the whole leaf, the non-C<sub>4</sub> *MDH* contains the same DHS but shows variation in DGF

485 between the cell-types, and the NAC transcription factor contains DGF derived from both regions  
486 that share DHS, but also one that lack a DHS in the whole leaf sample. (E) Representation of the  
487 core C<sub>4</sub> pathway showing differentially accessible DHS, DGF and cell-specific DGF in whole leaf  
488 (blue) and bundle sheath (orange) samples of *S. bicolor*. CA; Carbonic Anhydrase, PEPC;  
489 Phosphoenolpyruvate carboxylase, PPK; Pyruvate,orthophosphate dikinase, MDH; Malate  
490 dehydrogenase, NADP-ME; NADP- dependent malic enzyme, RBCS1A; Ribulose bisphosphate  
491 carboxylase small subunit 1A, OAA; Oxaloacetate, Mal; Malate, PEP; Phosphoenolpyruvate, Pyr;  
492 Pyruvate, Asp; Aspartate.

493

494 **Figure 3: Distinct cistromes in monocotyledons and dicotyledons.** (A) Number of previously  
495 reported motifs as well as those defined *de novo* in the grasses. (B) Density plots depicting  
496 average DNase-I activity on positive (red) and negative (blue) strands centred around a *de novo*  
497 motif. (C) Bar chart depicting percentage of DGF annotated with known or *de novo* motifs. (D)  
498 Comparison of TF motif prevalence in Whole Leaf (WL) samples from *S. italica*, *Z. mays*, *B.*  
499 *distachyon* and *A. thaliana* compared with *S. bicolor*. Word clouds depict frequency of motifs  
500 associated with transcription factor families, with larger names more abundant. Scatter plots  
501 compare frequency of transcription factor motifs within DGF, ranked from low (most abundant) to  
502 high (least abundant). Correlation between samples is indicated as Kendell's Tau coefficient ( $\tau$ ).  
503 (E) Comparison of transcription factor motif prevalence in BS enriched and whole leaf enriched  
504 DGF from *S. bicolor*. Word clouds depict frequency of motifs associated with transcription factor  
505 families. (F) Frequency plots of transcription factor motifs in whole leaf or BS samples ranked from  
506 low to high. Motifs that ranked in the top 50% most prevalent in one cell type and the bottom 50%  
507 in the other are depicted in red. (G) Diagram summarising motifs associated with specific  
508 transcription factor families that are over-represented in BS or whole leaves from *S. italica*, *S.*  
509 *bicolor* and *Z. mays*. The most common transcription factor families are represented. (H)  
510 Scatterplots comparing mean transcript per million (TPM) values in bundle sheath and mesophyll  
511 cells (data from Chang et al., 2012; Emms et al., 2016; John et al., 2014) for members of the  
512 C2C2-GATA family in *S. bicolor*, *Z. mays* and *S. italica*. Orthologous genes that are consistently  
513 enriched in mesophyll cells are highlighted in red.



514 **Figure 4: *Cis*-elements show high rates of turnover and mobility in grasses.** (A) Scenarios of  
515 DGF conservation between species. Reads derived from DNase-I cuts are depicted by grey, DGF  
516 that are both conserved and occupied between species by red, and DGF that are conserved but  
517 unoccupied by blue shading. (B) Bar-plot representing pairwise comparisons of DGF occupancy.  
518 (C&D) Schematic depicting the position of four transcription factor motifs that are consistently  
519 associated with oxaloacetate transporter (*OMT1*) in *S. bicolor*, *Z. mays* and *S. italica* (C) and three  
520 transcription factor motifs that are consistently associated with the bundle sheath enriched gene  
521 *TKL* in *S. bicolor*, *Z. mays*, *S. italica* and *C<sub>3</sub> B. distachyon* (D). The relative position of conserved  
522 motifs between orthologous genes is depicted by solid lines (blue, orange, green) and varies  
523 between species.

524

525 **Figure 5: Hyper-conserved *cis*-elements in grasses recruited into *C<sub>4</sub>* photosynthesis.** (A)  
526 Conservation of *cis*-regulation in *C<sub>4</sub>* and Calvin Benson Bassham cycle genes following the  
527 divergence of *Z. mays* and *S. bicolor*. The number of carbon atoms (red dots) and metabolite flow  
528 (red dashed line) between mesophyll (grey) and bundle sheath (orange) cells are illustrated along  
529 with the degree of conservation of DGF associated with BS strands. (B) Conservation of DGF  
530 occupancy in grasses across evolutionary time. Results are depicted for whole leaf (WL - blue) and  
531 bundle sheath (BS - orange) DGF. Pie-charts display the distribution of conserved and occupied  
532 DGF for whole leaf and BS strands. Promoters are defined as 3000bp upstream the transcriptional  
533 start site while downstream and intergenic features represent 1000 and >1000bp downstream of  
534 the transcription termination site respectively. (C) Evolution of *cis*-regulation in *NdhM* - the BS is  
535 enriched in the *Ndh* complex that takes part in cyclic electron flow (CEF). *NdhM* transcript  
536 abundance is higher in BS than M cells of *C<sub>4</sub>* species (data from Chang et al., 2012; Emms et al.,  
537 2016; John et al., 2014). (D) DGF in orthologous *Ndh* sequences (grey) and conserved and  
538 occupied (red). A single DGF is conserved in all four monocot species. In the ancestral *C<sub>3</sub>* state  
539 this footprint is present in whole leaf samples, but in the derived *C<sub>4</sub>* state it is occupied in the BS.  
540 An additional footprint is present upstream or downstream in whole leaf tissues which may prevent  
541 binding in mesophyll cells.

542

543 **Figure S1:** DNase-I digestion of nuclei for sequencing. Representative images of digested  
544 samples separated on a 2% (w/v) agarose gels by electrophoresis. (A) *S. bicolor* WL (B) *S. bicolor*  
545 BS (C) *Z. mays* WL (D) *Z. mays* BS (E) *B. distachyon* WL (F) *S. italica* WL (G) *S. italica* BS. Each  
546 gel represents a separate biological replicate, and the units of DNase-I used are illustrated above.  
547 Samples selected for sequencing are indicated in red.

548

549 **Figure S2:** Density plots depicting the distribution of DGF -4000 to +4000 base pairs from the  
550 transcriptional start site (TSS) of *S. bicolor*, *Z. mays*, *S. italica* and *B. distachyon* whole leaves. In  
551 each case, the distribution shows greater transcription factor binding after the transcriptional start  
552 site.

553

554 **Figure S3:** Bar chart depicting the number of DGF statistically enriched in bundle sheath cells of *S.*  
555 *bicolor*, *Z. mays* and *S. italica*.

556

557 **Figure S4:** Transcript abundance expressed as transcripts per million reads (TPM) of three co-  
558 linear genes on chromosome seven of sorghum. *C<sub>4</sub> MDH* (Sobic.007G166300.1), non *C<sub>4</sub> MDH*  
559 (non *C<sub>4</sub>*, Sobic.007G166200.1), and an uncharacterised *NAC* domain protein  
560 (Sobic.007G166100.1) in BS or M cells.

561

562 **Figure S5:** Gene expression in mesophyll and bundle sheath cells associated DHS and DGF in *S.*  
563 *bicolor*. (A) Cell preferential gene expression profiles of highly abundant M and BS genes  
564 expressed as transcripts per million reads (TPM). (B) Schematic representing DHS, DGF and DE  
565 DGF present in WL (blue) and BS (orange) of *S. bicolor*.

566

567 **Figure S6:** Differential accessibility of broad regulatory regions in *S. bicolor* is not sufficient for cell  
568 preferential gene expression. Percentage of differentially detected DHS among BS and M specific  
569 genes (n=50) in *S. bicolor* compared against randomly generated gene samples.

570

571 **Figure S7:** Representation of the C<sub>4</sub> pathway showing differentially accessible DHS, DGF and cell  
572 specific DGF between whole leaf (blue) and bundle sheath (orange) samples in *S. italica* (A) and *Z.*  
573 *mays* (B). CA; Carbonic Anhydrase, PEPC; Phosphoenolpyruvate carboxylase, PPDK; Pyruvate,  
574 orthophosphate dikinase, MDH; Malate dehydrogenase, NADP-ME; NADP-dependent malic  
575 enzyme, RBCS1A; Ribulose biphosphate carboxylase small subunit1A, OAA; Oxaloacetate, Mal;  
576 Malate, PEP; Phosphoenolpyruvate, Pyr; Pyruvate, Asp; Aspartate.

577

578 **Figure S8:** Proportion of motifs from whole leaf DGF in each genomic feature of *S. bicolor*, *Z.*  
579 *mays*, *S. italica* and *B. distachyon*. The majority of motifs are distributed across all genomic  
580 features, and so the proportion associated with any one feature is relatively low. However, a set of  
581 motifs are enriched in coding sequences.

582

583 **Figure S9:** A group of 96 motifs are preferentially associated with coding sequences in grasses.  
584 (A) Proportion of all annotated motifs in coding sequence for *S. bicolor* compared with *Z. mays*, *S.*  
585 *italica* and *B. distachyon*. (B) Heatmap showing the association of motifs with each genomic  
586 feature. The horizontal bar at the top represents five clusters obtained by k-means. Hierarchical  
587 clustering was used to group genomic features in *S. bicolor* (Sb), *Z. mays* (Zm), *S. italica* (Si) and  
588 *B. distachyon* (Bd). (C) Representative motifs associated with coding sequences in *S. bicolor* (top).  
589 TreeView diagrams illustrating cut density around representative motifs in coding sequences  
590 (middle). Each row represents an individual DGF, cuts are coloured according to strand alignment.  
591 The number of motif hits in coding sequence are listed in the left. Density plots depicting average  
592 DNase I activity on positive (red) and negative (blue) strands centred around motifs are shown at  
593 the bottom.

594

595 **Figure S10:** Distribution within genomic features of 96 motifs associated with DGF in coding  
596 sequences from whole leaves of *S. bicolor*, *Z. mays*, *S. italica* and *B. distachyon*.

597

598 **Figure S11:** Distribution within genomic features of 47 motifs associated with DGF in coding  
599 sequences and found within hyper-conserved DGF (Figure 5) from whole leaves of *S. bicolor*, *Z.*  
600 *mays*, *S. italica* and *B. distachyon*.

601

602 **Figure S12:** Distribution within genomic features of 55 motifs associated with DGF in coding  
603 sequences and found within hyper-conserved DGF (Figure 5) from bundle sheath strands of *S.*  
604 *bicolor*, *Z. mays*, *S. italica* and *B. distachyon*.

605

606 **Table S1: Summary of DNase-SEQ Quality Metrics.** Values were calculated according to (Landt  
607 et al., 2012) and include the number of reads mapped following filtering (NMAP), PCR bottleneck  
608 Coefficient (PCB), Normalized Strand Cross-correlation Coefficient (NSC), Relative Strand Cross-  
609 correlation Coefficient (RSC) the optimal number of peaks calculated by IDR method (PEAKS),  
610 and the Signal Portion Of Tags (SPOT) for WL and BS samples from *B. distachyon*, *S. italica*, *S.*  
611 *bicolor* and *Z. mays*.

612

613 **Table S2: Summary Statistics for Genomic Features Identified in Whole Leaf Samples.**  
614 Including information about the number of DHS and DGF identified per sample, and the number of  
615 genes that could be annotated with at least one genomic feature for *B. distachyon*, *S. italica*, *S.*  
616 *bicolor* and *Z. mays*.

617

618 **Table S3: Base-pair percentages in DGFs and the genome of *S. bicolor*, *Z. mays*, *S. italica***  
619 **and *B. distachyon*.**

620

621 **Table S4: Summary Statistics for Genomic Features Identified in Bundle Sheath Samples.**  
622 Including information about the number of DHS and DGF identified per sample, and the number of  
623 genes that could be annotated with at least one genomic feature for *B. distachyon*, *S. italica*, *S.*  
624 *bicolor* and *Z. mays*.

625

626 **Table S5: Summary Statistics of Overlap between DHS in Whole Leaf and Bundle Sheath**  
627 **Samples.**

628

629 **Table S6: Summary Statistics of Overlap between DGF in Whole Leaf and Bundle Sheath**  
630 **Samples.**

631

632 **Table S7: Summary Statistics for Differential Digital Genomic Footprint Calling.** Including the  
633 total number of differential DGF (DE DGF) and the number of DE DGF in DE genes for *S. italica*,  
634 *S. bicolor* and *Z. mays*.

635

636 **Table S8: Statistics for Cross Mapping of genomic features between *S. bicolor*, *S. italica*, *Z.***  
637 ***mays* and *B. distachyon*.**

638

639 **Table S9: TF family motifs enriched (FDR<0.05) in differential footprints from *S.***  
640 ***bicolor*, *Z. mays* and *S. italica* WL and BS samples.**

641

642 **Table S10: Identifiers of orthologous C<sub>4</sub> and CBB cycle related genes from *S. bicolor*, *S.***  
643 ***italica*, *Z. mays* and *B. distachyon*.**

644

645 **Table S11: C<sub>4</sub> and CCB genes associated with the same known or *de novo* transcription**  
646 **factor binding motifs in *Z. mays*, *S. bicolor*, *S. italica* and *B. distachyon*.**

## 647 **Methods**

### 648 **Growth conditions and isolation of nuclei**

649 *S. bicolor*, *S. italica* and *Z. mays* were grown under controlled conditions at the University of  
650 Cambridge in a chamber set to 12h/12h light/dark; 28°C light/20°C dark; 400 $\mu$ mol m<sup>-2</sup> s<sup>-1</sup> photon  
651 flux density, 60% humidity. For germination, *S. bicolor* and *Z. mays* seeds were imbibed in dH<sub>2</sub>O  
652 for 48h, *S. italica* seeds were incubated on wet filter paper at 30°C overnight in the dark. *Z. mays*,  
653 *S. bicolor* and *S. italica* were grown on 3:1 (v/v) M3 compost to medium vermiculite mixture, with a  
654 thin covering of soil. Seedlings were hand-watered. For *B. distachyon* plants were grown under  
655 controlled conditions at the Sainsbury Laboratory Cambridge University, first under short day  
656 conditions 14h/10h, light/dark for 2 weeks and then shifted to long day 20h/4h, light/dark, for 1  
657 week and harvested at ZT20. Temperature was set at 20°C, humidity 65% and light intensity  
658 350 $\mu$ mol m<sup>-2</sup> s<sup>-1</sup>.

659 To isolate nuclei from *S. bicolor*, *Z. mays* and *S. italica* mature third and fourth leaves with a  
660 fully developed ligule were harvested 4-6 h into the light cycle on the 18<sup>th</sup> day after germination.  
661 Bundle sheath cells were mechanically isolated (Covshoff et al., 2013). At least 3 g of tissue was  
662 used for each extraction. Nuclei were isolated using a sucrose gradient adapted from (Gendrel et  
663 al., 2005) and the amount of nuclei in each preparation was quantified using a haemocytometer.  
664 For *B. distachyon* plants were flash frozen and material pulverised in a coffee grinder. 3g of plant  
665 material was added to 45 ml NIB buffer (10mM Tris-HCl, 0.2M sucrose, 0.01% (v/v) Triton X-100,  
666 pH 5.3 containing protease inhibitors (SIGMA)) and incubated at 4°C on a rotating wheel for 5 min,  
667 afterwards debris was removed by sieving through 2 layers of Miracloth (millipore) into pre-cooled  
668 flasks. Nuclei were spun down 4,000rpm, 4°C for 20 min. Plastids were lysed by adding Triton to  
669 a final concentration of 0.3% (v/v) and incubated for 15 min on ice. Nuclei were pelleted  
670 by centrifugation at 5000 rpm at 4°C for 15 min. Pellets were washed 3 times with chilled NIB  
671 buffer.

672

### 673 **DNase-I digestion, sequencing and library preparation**

674 To obtain sufficient DNA each biological replicate consisted of leaves from tens of individuals  
675 and to conform to standards set by the Human Genome project at least two biological replicates

676 were sequenced for each sample.  $2 \times 10^8$  of freshly extracted nuclei were re-suspended at 4°C in  
677 digestion buffer (15 mM Tris-HCl, 90 mM NaCl, 60 mM KCl, 6 mM CaCl<sub>2</sub>, 0.5 mM spermidine, 1  
678 mM EDTA and 0.5 mM EGTA, pH 8.0). DNase-I (Fermentas) at 7.5 U was added to each tube and  
679 incubated at 37 °C for 3 min. Digestion was arrested with addition of 1:1 volume of stop buffer (50  
680 mM Tris-HCl, 100 mM NaCl, 0.1% (w/v) SDS, 100 mM EDTA, pH 8.0, 1 mM Spermidine, 0.3mM  
681 Spermine, RNase A 40 µg/ml ) and incubated at 55°C for 15 min. 50 U of Proteinase K was added  
682 and samples incubated at 55 °C for 1 h. DNA was isolated with 25:24:1 Phenol:Chloroform:Isoamyl  
683 Alcohol (Ambion) followed by ethanol precipitation. Samples were then size-selected using  
684 agarose gel electrophoresis. The extracted DNA samples were quantified fluorometrically with a  
685 Qubit 3.0 Fluorometer (Life technologies), and a total of 10 ng of digested DNA (200 pg l<sup>-1</sup>) was  
686 used for library construction.

687 Initial sample quality control of pre-fragmented DNA was assessed using a TapeStation DNA  
688 1000 High sensitivity Screen tape (Agilent, Cheadle UK). Sequencing ready libraries were  
689 prepared using the Hyper Prep DNA Library preparation kit (Kapa Biosystems, London UK)  
690 according to the manufacturer's instructions and indexed for pooling using NextFlex DNA barcoded  
691 adapters (Bioo Scientific, Austin TX US). Libraries were quantified using a TapeStation DNA 1000  
692 Screen tape and by qPCR using an NGS Library Quantification Kit (KAPA Biosystems) on an  
693 AriaMx qPCR system (Agilent) and then normalised, pooled, diluted and denatured for sequencing  
694 on the NextSeq 500 (Illumina, Chesterford UK). The main library was spiked at 10% with the PhiX  
695 control library (Illumina). Sequencing was performed using Illumina NextSeq in the Departments of  
696 Biochemistry and Pathology at the University of Cambridge, UK, with 2x75 cycles of sequencing.

697

## 698 **Data processing**

699 Genome sequences were downloaded from Phytozome (v10) (Goodstein et al., 2012). The  
700 following genome assemblies were used: Bdistachyon\_283\_assembly\_v2.0; Sbicolor\_255\_v2.0;  
701 Sitalica\_164\_v2; Zmays\_284\_AGPv3. Reads were mapped to genomes using bowtie2 (Langmead  
702 and Salzberg, 2012) with the following parameters:

703

704 `--local -D 15 -R 2 -N 0 -L 20 -I S,1,0.75.`



705

706 Aligned reads were then processed using samtools (Li et al., 2009) to remove those with a MAPQ  
707 score <42. DHS sites were identified using a procedure adapted from the ENCODE 3 pipeline  
708 (<https://sites.google.com/site/anshulkundaje/projects/idr>) (Marinov et al., 2014). Briefly DHS were  
709 called using MACS2 (Feng et al., 2012) with the following parameters to offset read locations in  
710 order to position DHS cut site in the middle of peak regions:

711

```
712 -p 1e-1 --nomodel --extsize 150 --shift -75 --llocal 50000
```

713

714 The final set of peak calls were determined using the irreproducible discovery rate (IDR (Li et al.,  
715 2011)) and calculated using the script `batch_consistency_analysis.R`  
716 ([https://github.com/modENCODE-DCC/Galaxy/blob/master/modENCODE\\_DCC\\_tools/idr/batch-](https://github.com/modENCODE-DCC/Galaxy/blob/master/modENCODE_DCC_tools/idr/batch-consistency-analysis.r)  
717 `consistency-analysis.r`).

718

### 719 **Quality metrics and identification of Digital Genomic Footprints (DGF)**

720 SPOT score (number of a subsample of mapped reads (5M) in DHS/Total number of  
721 subsampled, mapped reads (5M) (John et al., 2011)) was calculated using BEDTools (Quinlan and  
722 Hall, 2010) to determine the number of mapped reads possessing at least 1bp overlap with a DHS  
723 site. NSC and RSC scores were calculated using SPP (Kharchenko et al., 2008) and PCR  
724 bottleneck coefficient (PCB) was calculated using BEDTools and the following bash code:

```
725 bedtools bamtobed --bedpe -l ${FILT_BAM_FILE_n} | awk 'BEGIN{OFS="\t"}{print  
726 $1,$2,$4,$6,$9,$10}' | grep -v 'ChrM\|ChrC'| sort | uniq -c | awk 'BEGIN{mt=0;m0=0;m1=0;m2=0}  
727 ($1==1){m1=m1+1} ($1==2){m2=m2+1} {m0=m0+1} {mt=mt+$1} END{printf  
728 "%d\t%d\t%d\t%d\t%ft%ft%f\n",mt,m0,m1,m2,m0/mt,m1/m0,m1/m2}' > ${PBC_FILE_QC}`
```

729

730 Digital Genomic Footprints (DGF) were identified using the Wellington algorithm (Piper et al., 2013)  
731 in the pyDNase software package (<http://pythonhosted.org/pyDNase/>) with the following  
732 parameters:

```
733 -fdr 0.05 [regions] [reads] [output directory]
```

734

735 where [reads] represents a BED file of DHS locations within which footprints were called and  
736 [reads] a filtered BAM file of sequenced reads.

737 Differential DGF were identified using Wellington bootstrap algorithm (Piper et al., 2015) from  
738 pyDNase package with the following parameters:

739

740 `-fdr 0.05 [treatment_BAM] [control_BAM] [regions] [treatment_output] [control_output]`

741

742 Where [treatment\_BAM] is a filtered BAM file containing sequenced reads from the sample of  
743 interest, [control\_BAM] is a filtered BAM file containing mapped sequenced reads against sample  
744 for comparison; [regions] is a BED file containing DHS locations within which footprints are called.  
745 All DE DGFs with a threshold of score equal and higher than 10 were considered as differentially  
746 abundant DGFs.

747

#### 748 **Data visualisation**

749 DHS and DGF sequences were loaded into and visualized in the Integrative Genomics Viewer  
750 (Thorvaldsdóttir et al., 2013) and figures produced in Inkscape, bar plots were generated with R  
751 package ggplot2 (Wickham, 2009), scatterplots using R function plot() and figures depicting  
752 conservation of DGF or motifs between orthologous sequences were generated using genoplotR  
753 (Guy et al., 2010). Word clouds were created with the wordcloud R package (Fellows, 2012).

754 TreeView images were produced in two stages. The script 'dnase\_to\_javatreeview.py' from  
755 pyDNAse was run with the following parameters to generate the input file:

756

757 `[regions_BED] [reads_BAM] [OUTPUT]`

758

759 Where [regions\_BED] is a bed file containing locations of all DGF sites, [reads\_BAM] is the BAM  
760 file containing all aligned reads, and [OUTPUT] specifies the output csv file name. To visualize files  
761 Java TreeView (Saldanha, 2004) was run with the following command:

762

763 `java -Xmx4G -jar TreeView.jar`

764

765 Changing the file format settings to All Files, the csv file from pyDNase was loaded into TreeView,  
766 from the dropdown menu entered Settings->Pixel Setting and checked all the Fill boxes, Contrast  
767 Value 1 and colours Red and Blue, the output was saved as .svg file.

768 Average cut density plots were generated using the script 'dnase\_average\_profile.py' from  
769 pyDNase (Piper et al., 2013, 2015) with the following parameters:

770

771 `-w 100 -b [regions_BED] [reads_BAM] [OUTPUT]`

772

773 Where [regions\_BED] is a bed file containing locations of all DGF sites, [reads\_BAM] is the BAM  
774 file containing all aligned reads, and [OUTPUT] specifies the output file name.

775 Genomic features were annotated and distribution calculated using the Bioconductor package  
776 ChIPpeakAnno (Zhu, 2013; Zhu et al., 2010a) interfaced with a custom R script. The required gff3  
777 files (Goodstein et al., 2012) (Sitalica\_164\_v2.1.gene\_exons.gff3;  
778 Sbicolor\_255\_v2.1.gene\_exons.gff3; Zmays\_284\_6a.gene.exons.gff3;  
779 Bdistachyon\_283\_v2.1.gene\_exons.gff3) downloaded from Phytozome.

780 In order to convert motif files into MEME format for motif scanning a multi-step procedure was  
781 necessary. Background frequency files are required when generating motifs (Thijs et al., 2001); to  
782 produce background files FASTA sequences for the regions of interest (DGF) were extracted using  
783 BEDTools suite (Quinlan and Hall, 2010) with the following command:

784

785 `bedtools getfasta -fi [FASTA_genome] -bed [regions]-fo [FASTA_regions]`

786

787 Background frequency files were tailored for each species for motif searching, using scripts from  
788 the meme suite (Bailey et al., 2009).

789

790 `fasta-get-markov [FASTA_all] [background_file_MEME]`

791

792 Motif files in FASTA format were converted to STAMP format using the online tool  
793 (<http://www.benoslab.pitt.edu/stamp/>) (Mahony and Benos, 2007), then RSTAT was used to  
794 convert STAMP format into TRANSFAC format ([http://rsat01.biologie.ens.fr/rsa-tools/convert-](http://rsat01.biologie.ens.fr/rsa-tools/convert-matrix_form.cgi)  
795 [matrix\\_form.cgi](http://rsat01.biologie.ens.fr/rsa-tools/convert-matrix_form.cgi)) (Medina-Rivera et al., 2015). A bug in the transfac2meme script requires that all  
796 bp frequencies are represented as floating point numbers containing two decimal places. In order  
797 to convert the TRANSFAC file to a suitable format the following code was used:

```
798 sed 's/0 /0.00/g' [transfac file] | sed 's/1 /1.00/g' | sed 's/2 /2.00/g' | sed 's/3 /3.00/g' | sed 's/4  
799 /4.00/g' | sed 's/5 /5.00/g' | sed 's/6 /6.00/g' | sed 's/7 /7.00/g' | sed 's/8 /8.00/g' | sed 's/9 /9.00/g' |  
800 sed 's/0$/0.00/g' | sed 's/1$/1.00/g' | sed 's/2$/2.00/g' | sed 's/3$/3.00/g' | sed 's/4$/4.00/g' | sed  
801 's/5$/5.00/g' | sed 's/6$/6.00/g' | sed 's/7$/7.00/g' | sed 's/8$/8.00/g' | sed 's/9$/9.00/g' | sed  
802 's/^\P0.00 ^\P0/g' > [transfac_fixed]
```

803

804 MEME motif files were created from TRANSFAC files using scripts from the MEME suite (Bailey et  
805 al., 2009) with the following command:

806

```
807 transfac2meme -bg [background_file] [transfac_fixed] > [MEME_FILE]
```

808

809 where [background\_file] is the background base pair distribution file and [MEME\_FILE] is the motif  
810 file output.

811

## 812 ***de novo* motif prediction, motif scanning and enrichment testing**

813 *de novo* motif prediction was performed using findMotifsGenome.pl script from the HOMER  
814 suite (Heinz et al., 2010) using digital genomic footprints (DGF) as input together with the  
815 reference genome sequence for each species with the following command:

816

```
817 findMotifsGenome.pl [INPUT_DGFs.bed] [REF_GENOME.fasta] [OUTFILE].motifs -size 200 -cpg
```

818

819 A set of 872 transcription factor binding motifs (O'Malley et al., 2016) in meme format was  
820 downloaded from

821 [http://neomorph.salk.edu/dev/pages/shhuang/dap\\_web/pages/browse\\_table\\_aj.php](http://neomorph.salk.edu/dev/pages/shhuang/dap_web/pages/browse_table_aj.php)

822 Motif scanning was performed using FIMO (Grant et al., 2011) with default parameters:

823

824 `--bgfile [background_file] --o [OUTPUT_FILE] [MOTIF_FILE] [FASTA_REGIONS]`

825

826 where [background\_file] is the background base pair distribution file, [OUTPUT\_FILE] is the output  
827 file name, [MOTIF\_FILE] is the file containing input motif(s) in MEME format and  
828 [FASTA\_REGIONS] is a FASTA file containing all DGF sequences motifs are scanned against.

829 To determine overrepresentation of TF family motifs in samples hypergeometric tests were  
830 performed using R with the following parameters:

831 `over<-phyper(hitInSample-1,hitInPop,faillnPop,sampleSize,lower.tail=F)`

832 where:

833 Population: Unique genes with an annotation in whole leaf and bundles sheath samples.

834 sampleSize: Number of unique genes with an annotation in whole leaf samples.

835 HitInPop: Total number of unique genes annotated with given transcription factor in tissue sample.

836 HitInSample: Number of unique genes sharing an annotation in WL and BS samples (overlap).

837 failInPop: Number of unique genes with annotation only in WL samples.

838 p-values were adjusted for the false discovery rate using the procedure of Benjamini & Hochberg  
839 (Benjamini and Hochberg, 1995).

840

841 The distribution of each motif across different genomic features was obtained for each of the 525  
842 known annotated motifs by dividing the number of hits in a particular feature by the total number of  
843 hits in the genome. K-means clustering was then employed to group motifs by genomic feature in  
844 *Z. mays*, *S. italica*, *S. bicolor* and *B. distachyon*.

845

#### 846 **Whole genome alignments and pairwise cross mapping of genomic features**

847 To cross map genomic features between species, mapping files were generated according to  
848 ([http://genomewiki.ucsc.edu/index.php/Whole\\_genome\\_alignment\\_howto](http://genomewiki.ucsc.edu/index.php/Whole_genome_alignment_howto)) using tools from the

849 UCSC Genome Browser, including trfBig, faToNib, faSize, lavToPsl, faSplit, axtChain, chainNet  
850 (Kent et al., 2002) and LASTZ (Harris, 2007).

851 Genomic features were then mapped between genomes using bnMapper (Denas et al., 2015)  
852 and the following parameters:

853

854 `-fBED4 -threshold 0.7 -o [outfile] [infile] [Chain file]`

855

856 where [infile] is a BED file of DGF locations in the species of origin, [Chain file] is a chain file  
857 providing mapping coordinates between the species of origin and comparison.

858

## 859 **Data**

860 Detailed step by step methods are available for DNase I digestion are on protocols.io  
861 ([dx.doi.org/10.17504/protocols.io.hdfb23n](https://doi.org/10.17504/protocols.io.hdfb23n)), Raw sequencing data and processed files are  
862 deposited in Gene Expression Omnibus (GSE97369).

863

864 **Contributions:** SJB and I-RL grew and harvested nuclei from *S. bicolor*, *S. italica* and *Z. mays*. KJ  
865 provided the nuclei from *B. distachyon*. SJB and I-RL performed DNase I digestion and data  
866 analysis. SJB, I-RL and JMH wrote the manuscript and prepared the figures.

867

868 **Acknowledgements:** KJ was supported by a Gatsby Career Development Fellowship, IRL was  
869 supported by CONCyT and BBSRC grant BB/L014130, whilst SJB was supported by the *3to4*  
870 grant from the EU and BB/I002243 from the BBSRC.

871 **References**

- 872 Bailey, T.L., Boden, M., Buske, F.A., Frith, M., Grant, C.E., Clementi, L., Ren, J., Li, W.W., and  
873 Noble, W.S. (2009). MEME Suite: tools for motif discovery and searching. *Nucleic Acids Res.* 37,  
874 W202–W208.
- 875 Bauwe, H., Hagemann, M., and Fernie, A.R. (2010). Photorespiration: players, partners and origin.  
876 *Trends Plant Sci.* 15, 330–336.
- 877 Benjamini, Y., and Hochberg, Y. (1995). Controlling the False Discovery Rate: A Practical and  
878 Powerful Approach to Multiple Testing. *J. R. Stat. Soc. Ser. B* 57, 289–300.
- 879 Bowes, G., Ogren, W.L., and Hageman, R.H. (1971). Phosphoglycolate production catalyzed by  
880 ribulose diphosphate carboxylase. *Biochem. Biophys. Res. Commun.* 45, 716–722.
- 881 Brown, N.J., Newell, C.A., Stanley, S., Chen, J.E., Perrin, A.J., Kajala, K., and Hibberd, J.M.  
882 (2011). Independent and Parallel Recruitment of Preexisting Mechanisms Underlying C<sub>4</sub>  
883 Photosynthesis. *Science* 331, 1436–1439.
- 884 Chang, Y.M., Liu, W.Y., Shih, A.C., Shen, M.N., Lu, C.H., Lu, M.Y., Yang, H.W., Wang, T.Y., Chen,  
885 S.C., Chen, S.M., et al. (2012). Characterizing regulatory and functional differentiation between  
886 maize mesophyll and bundle sheath cells by transcriptomic analysis. *Plant Physiol* 160, 165–177.
- 887 Christin, P.-A., Salamin, N., Savolainen, V., Duvall, M.R., and Besnard, G. (2014). C<sub>4</sub>  
888 Photosynthesis Evolved in Grasses via Parallel Adaptive Genetic Changes. *Curr. Biol.* 17, 1241–  
889 1247.
- 890 Christin, P.A., Salamin, N., Savolainen, V., Duvall, M.R., and Besnard, G. (2007). C<sub>4</sub>  
891 photosynthesis evolved in grasses via parallel adaptive genetic changes. *Curr. Biol.* 17, 1241–  
892 1247.
- 893 Cornejo, M.-J., Luth, D., Blankenship, K.M., Anderson, O.D., and Blechl, A.E. (1993). Activity of a  
894 maize ubiquitin promoter in transgenic rice. *Plant Mol. Biol.* 23, 567–581.
- 895 Covshoff, S., Furbank, R.T., Leegood, R.C., and Hibberd, J.M. (2013). Leaf rolling allows  
896 quantification of mRNA abundance in mesophyll cells of sorghum. *J Exp Bot* 64, 807–813.
- 897 Deal, R.B., and Henikoff, S. (2011). The INTACT method for cell type-specific gene expression and  
898 chromatin profiling in *Arabidopsis thaliana*. *Nat. Protoc.* 6, 56–68.
- 899 Denas, O., Sandstrom, R., Cheng, Y., Beal, K., Herrero, J., Hardison, R.C., and Taylor, J. (2015).

- 900 Genome-wide comparative analysis reveals human-mouse regulatory landscape and evolution.  
901 BMC Genomics 16, 87.
- 902 Emms, D.M., Covshoff, S., Hibberd, J.M., and Kelly, S. (2016). Independent and Parallel Evolution  
903 of New Genes by Gene Duplication in Two Origins of C<sub>4</sub> Photosynthesis Provides New Insight into  
904 the Mechanism of Phloem Loading in C<sub>4</sub> Species. Mol. Biol. Evol. 33, 1796–1806.
- 905 Fellows, I. (2012). wordcloud: Word clouds. R Packag. Version 2, 109.
- 906 Feng, J., Liu, T., Qin, B., Zhang, Y., and Liu, X.S. (2012). Identifying ChIP-seq enrichment using  
907 MACS. Nat. Protoc. 7, 1728–1740.
- 908 Furbank, R.T. (2011). Evolution of the C<sub>4</sub> photosynthetic mechanism: are there really three C<sub>4</sub> acid  
909 decarboxylation types? J. Exp. Bot. 62, 3103–3108.
- 910 Furbank, R.T., Stitt, M., and Foyer, C.H. (1985). Intercellular compartmentation of sucrose  
911 synthesis in leaves of *Zea mays* L. Planta 164, 172–178.
- 912 Gendrel, A.-V., Lippman, Z., Martienssen, R., and Colot, V. (2005). Profiling histone modification  
913 patterns in plants using genomic tiling microarrays. Nat Meth 2, 213–218.
- 914 Goodstein, D.M., Shu, S., Howson, R., Neupane, R., Hayes, R.D., Fazo, J., Mitros, T., Dirks, W.,  
915 Hellsten, U., Putnam, N., et al. (2012). Phytozome: a comparative platform for green plant  
916 genomics. Nucleic Acids Res. 40, D1178-86.
- 917 Gowik, U., Burscheidt, J., Akyildiz, M., Schlue, U., Koczor, M., Streubel, M., and Westhoff, P.  
918 (2004). cis-Regulatory elements for mesophyll-specific gene expression in the C<sub>4</sub> plant *Flaveria*  
919 *trinervia*, the promoter of the C<sub>4</sub> phosphoenolpyruvate carboxylase gene. Plant Cell 16, 1077–  
920 1090.
- 921 Grant, C.E., Bailey, T.L., and Noble, W.S. (2011). FIMO: scanning for occurrences of a given motif.  
922 Bioinforma. 27, 1017–1018.
- 923 Guy, L., Roat Kultima, J., and Andersson, S.G.E. (2010). genoPlotR: comparative gene and  
924 genome visualization in R. Bioinformatics 26, 2334–2335.
- 925 Harris, R.S. (2007). Improved pairwise alignment of genomic DNA. The Pennsylvania State  
926 University.
- 927 Hatch, M.D. (1987). C<sub>4</sub> photosynthesis: a unique blend of modified biochemistry, anatomy and  
928 ultrastructure. Biochim. Biophys. Acta 895, 81–106.



- 929 Heinz, S., Benner, C., Spann, N., Bertolino, E., Lin, Y.C., and Laslo, P. (2010). Simple  
930 combinations of lineage-determining transcription factors prime cis-regulatory elements required  
931 for macrophage and B cell identities. *Mol. Cell.* 38.
- 932 Hesselberth, J.R., Chen, X., Zhang, Z., Sabo, P.J., Sandstrom, R., Reynolds, A.P., Thurman, R.E.,  
933 Neph, S., Kuehn, M.S., Noble, W.S., et al. (2009). Global mapping of protein-DNA interactions in  
934 vivo by digital genomic footprinting. *Nat. Methods* 6, 283–289.
- 935 Hibberd, J.M., and Covshoff, S. (2010). The regulation of gene expression required for C<sub>4</sub>  
936 photosynthesis. *Annu Rev Plant Biol* 61, 181–207.
- 937 Jeon, J.-S., Lee, S., Jung, K.-H., Jun, S.-H., Kim, C., and An, G. (2000). Tissue-Preferential  
938 Expression of a Rice  $\alpha$ -Tubulin Gene, OsTubA1, Mediated by the First Intron. *Plant Physiol.* 123,  
939 1005–1014.
- 940 John, C.R., Smith-Unna, R.D., Woodfield, H., Covshoff, S., and Hibberd, J.M. (2014). Evolutionary  
941 Convergence of Cell-Specific Gene Expression in Independent Lineages of C<sub>4</sub> Grasses. *Plant*  
942 *Physiol.* 165, 62–75.
- 943 John, S., Sabo, P.J., Thurman, R.E., Sung, M.-H., Biddie, S.C., Johnson, T.A., Hager, G.L., and  
944 Stamatoyannopoulos, J.A. (2011). Chromatin accessibility pre-determines glucocorticoid receptor  
945 binding patterns. *Nat Genet* 43, 264–268.
- 946 Jordan, D.B., and Ogren, W.L. (1984). The CO<sub>2</sub>/O<sub>2</sub> specificity of Ribulose 1,5-Bisphosphate  
947 Carboxylase Oxygenase - dependence on Ribulose bisphosphate concentration, pH and  
948 temperature. *Planta* 161, 308–313.
- 949 Kajala, K., Williams, B.P., Brown, N.J., Taylor, L.E., and Hibberd, J.M. (2011). Multiple Arabidopsis  
950 genes primed for direct recruitment into C<sub>4</sub> photosynthesis. *Plant J.* 69, 47–56.
- 951 Kent, W.J., Sugnet, C.W., Furey, T.S., Roskin, K.M., Pringle, T.H., Zahler, A.M., and Haussler,  
952 and D. (2002). The Human Genome Browser at UCSC. *Genome Res.* 12, 996–1006.
- 953 Kharchenko, P. V., Tolstorukov, M.Y., and Park, P.J. (2008). Design and analysis of ChIP-seq  
954 experiments for DNA-binding proteins. *Nat Biotech* 26, 1351–1359.
- 955 Kromdijk, J., Głowacka, K., Leonelli, L., Gabilly, S.T., Iwai, M., Niyogi, K.K., and Long, S.P. (2016).  
956 Improving photosynthesis and crop productivity by accelerating recovery from photoprotection.  
957 *Science* 354, 857–861.

- 958 Landt, S.G., Marinov, G.K., Kundaje, A., Kheradpour, P., Pauli, F., and Batzoglou, S. (2012). CHIP-  
959 seq guidelines and practices of the ENCODE and modENCODE consortia. *Genome Res* 22.
- 960 Langmead, B., and Salzberg, S.L. (2012). Fast gapped-read alignment with Bowtie 2. *Nat Meth* 9,  
961 357–359.
- 962 Leakey, A.D.B., Bishop, K.A., and Ainsworth, E.A. (2012). A multi-biome gap in understanding of  
963 crop and ecosystem responses to elevated CO<sub>2</sub>. *Curr. Opin. Plant Biol.* 15, 228–236.
- 964 Leegood, R.C. (1985). The intercellular compartmentation of metabolites in leaves of *Zea mays* L.  
965 *Planta* 164, 163–171.
- 966 Lefebvre, S., Lawson, T., Fryer, M., Zakhleniuk, O. V, Lloyd, J.C., and Raines, C.A. (2005).  
967 Increased Sedoheptulose-1,7-Bisphosphatase Activity in Transgenic Tobacco Plants Stimulates  
968 Photosynthesis and Growth from an Early Stage in Development. *Plant Physiol.* 138, 451–460.
- 969 Li, H., Handsaker, B., Wysoker, A., Fennell, T., Ruan, J., Homer, N., Marth, G., Abecasis, G.,  
970 Durbin, R., and Subgroup, 1000 Genome Project Data Processing (2009). The Sequence  
971 Alignment/Map format and SAMtools. *Bioinformatics* 25, 2078–2079.
- 972 Li, Q., Brown, J.B., Huang, H., and Bickel, P.J. (2011). Measuring reproducibility of high-throughput  
973 experiments. *Ann. Appl. Stat.* 5, 1752–1779.
- 974 Long, S.P., Marshall-Colon, A., and Zhu, X.-G. (2015). Meeting the Global Food Demand of the  
975 Future by Engineering Crop Photosynthesis and Yield Potential. *Cell* 161, 56–66.
- 976 Maas, C., Laufs, J., Grant, S., Korfhage, C., and Werr, W. (1991). The combination of a novel  
977 stimulatory element in the first exon of the maize Shrunken-1 gene with the following intron 1  
978 enhances reporter gene expression up to 1000-fold. *Plant Mol. Biol.* 16, 199–207.
- 979 Mahony, S., and Benos, P. V (2007). STAMP: a web tool for exploring DNA-binding motif  
980 similarities. *Nucleic Acids Res.* 35, W253–W258.
- 981 Marinov, G.K., Kundaje, A., Park, P.J., and Wold, B.J. (2014). Large-Scale Quality Analysis of  
982 Published ChIP-seq Data. *G3* 4, 209–223.
- 983 Martin, A., and Orgogozo, V. (2013). The Loci of repeated evolution: a catalog of genetic hotspots  
984 of phenotypic variation. *Evolution* 67, 1235–1250.
- 985 Matsuoka, M., and Numazawa, T. (1991). *Cis*-acting elements in the pyruvate, orthophosphate  
986 dikinase gene from maize. *Mol. Gen. Genet.* 228, 143–152.

987 Medina-Rivera, A., Defrance, M., Sand, O., Herrmann, C., Castro-Mondragon, J.A., Delerce, J.,  
988 Jaeger, S., Blanchet, C., Vincens, P., Caron, C., et al. (2015). RSAT 2015: Regulatory Sequence  
989 Analysis Tools. *Nucleic Acids Res.* 43: W50-W56.

990 Miyagawa, Y., Tamoi, M., and Shigeoka, S. (2001). Overexpression of a cyanobacterial fructose-  
991 1,6-/sedoheptulose-1,7-bisphosphatase in tobacco enhances photosynthesis and growth. *Nat.*  
992 *Biotechnol.* 19, 965–969.

993 Neph, S., Vierstra, J., Stergachis, A.B., Reynolds, A.P., Haugen, E., Vernot, B., Thurman, R.E.,  
994 John, S., Sandstrom, R., Johnson, A.K., et al. (2012). An expansive human regulatory lexicon  
995 encoded in transcription factor footprints. *Nature* 489, 83–90.

996 O'Malley, R.C., Huang, S.C., Song, L., Lewsey, M.G., Bartlett, A., Nery, J.R., Galli, M., Gallavotti,  
997 A., and Ecker, J.R. (2016). Cistrome and Epicistrome Features Shape the Regulatory DNA  
998 Landscape. *Cell* 165, 1280–1292.

999 Ort, D.R., Merchant, S.S., Alric, J., Barkan, A., Blankenship, R.E., Bock, R., Croce, R., Hanson,  
1000 M.R., Hibberd, J.M., Long, S.P., et al. (2015). Redesigning photosynthesis to sustainably meet  
1001 global food and bioenergy demand. *Proc. Natl. Acad. Sci.* 112, 8529–8536.

1002 Patel, M., Corey, A.C., Yin, L.P., Ali, S.J., Taylor, W.C., and Berry, J.O. (2004). Untranslated  
1003 regions from C-4 amaranth AhRbcS1 mRNAs confer translational enhancement and preferential  
1004 bundle sheath cell expression in transgenic C<sub>4</sub> *Flaveria bidentis*. *Plant Physiol.* 136, 3550–3561.

1005 Piper, J., Elze, M.C., Cauchy, P., Cockerill, P.N., Bonifer, C., and Ott, S. (2013). Wellington: a  
1006 novel method for the accurate identification of digital genomic footprints from DNase-seq data.  
1007 *Nucleic Acids Res.* 41, e201-e201.

1008 Piper, J., Assi, S.A., Cauchy, P., Ladroue, C., Cockerill, P.N., Bonifer, C., and Ott, S. (2015).  
1009 Wellington-bootstrap: differential DNase-seq footprinting identifies cell-type determining  
1010 transcription factors. *BMC Genomics* 16, 1000.

1011 Quinlan, A.R., and Hall, I.M. (2010). BEDTools: a flexible suite of utilities for comparing genomic  
1012 features. *Bioinforma.* 26, 841–842.

1013 Reyna-Llorens, I., Burgess, S.J., Williams, B.P., Stanley, S., Bournnell, C., and Hibberd, J.M.  
1014 (2016). Ancient coding sequences underpin the spatial patterning of gene expression in C<sub>4</sub> leaves.  
1015 bioRxiv doi: <https://doi.org/10.1101/085795>.

- 1016 Sage, R. (2004). The evolution of C<sub>4</sub> photosynthesis. *New Phytol.* *161*, 341–370.
- 1017 Sage, R.F., and Zhu, X.-G. (2011). Exploiting the engine of C<sub>4</sub> photosynthesis. *J. Exp. Bot.* *62*,  
1018 2989–3000.
- 1019 Sage, R.F., Christin, P.-A., and Edwards, E.J. (2011). The C<sub>4</sub> plant lineages of planet Earth. *J.*  
1020 *Exp. Bot.* *62*, 3171–3181.
- 1021 Sage, R.F., Sage, T.L., and Kocacinar, F. (2012). Photorespiration and the evolution of C<sub>4</sub>  
1022 photosynthesis. *Annu. Rev. Plant Biol.* *63*, 19–47.
- 1023 Saldanha, A.J. (2004). Java Treeview--extensible visualization of microarray data. *Bioinformatics.*  
1024 *20*.
- 1025 Sharwood, R.E., Ghannoum, O., Kapralov, M. V, Gunn, L.H., and Whitney, S.M. (2016).  
1026 Temperature responses of Rubisco from Paniceae grasses provide opportunities for improving C<sub>3</sub>  
1027 photosynthesis. *Nat. Plants* *2*, 16186.
- 1028 Sheen, J. (1999). C<sub>4</sub> gene expression. *Ann. Rev. Plant Physiol. Plant Mol Biol* *50*, 187–217.
- 1029 Stergachis, A.B., Haugen, E., Shafer, A., Fu, W., Vernot, B., Reynolds, A., Raubitschek, A.,  
1030 Ziegler, S., LeProust, E.M., Akey, J.M., et al. (2013). Exonic transcription factor binding directs  
1031 codon choice and affects protein evolution. *Science* *342*, 1367–1372.
- 1032 The International Brachypodium Initiative (2010). Genome sequencing and analysis of the model  
1033 grass *Brachypodium distachyon*. *Nature* *463*, 763–768.
- 1034 Thijs, G., Lescot, M., Marchal, K., Rombauts, S., De Moor, B., Rouzé, P., and Moreau, Y. (2001). A  
1035 higher-order background model improves the detection of promoter regulatory elements by Gibbs  
1036 sampling. *Bioinformatics* *17*, 1113–1122.
- 1037 Thorvaldsdóttir, H., Robinson, J.T., and Mesirov, J.P. (2013). Integrative Genomics Viewer (IGV):  
1038 high-performance genomics data visualization and exploration. *Briefings Bioinforma.* *14*, 178–192.
- 1039 Thurman, R.E., Rynes, E., Humbert, R., Vierstra, J., Maurano, M.T., Haugen, E., Sheffield, N.C.,  
1040 Stergachis, A.B., Wang, H., Vernot, B., et al. (2012). The accessible chromatin landscape of the  
1041 human genome. *Nature* *489*, 75–82.
- 1042 Tolbert, N.E. (1971). Microbodies - peroxisomes and glyoxysomes. *Annu. Rev. Plant Physiol.* *22*,  
1043 45–74.
- 1044 Tsong, A.E., Tuch, B.B., Li, H., and Johnson, A.D. (2006). Evolution of alternative transcriptional

- 1045 circuits with identical logic. *Nature* 443, 415–420.
- 1046 Viret, J.F., Mabrouk, Y., and Bogorad, L. (1994). Transcriptional photoregulation of cell-type  
1047 preferred expression of maize *rbcS-m3*: 3' and 5' sequences are involved. *Proc. Natl. Acad. Sci.*  
1048 91, 8577–8581.
- 1049 Wang, J., Zhuang, J., Iyer, S., Lin, X., Whitfield, T.W., Greven, M.C., Pierce, B.G., Dong, X.,  
1050 Kundaje, A., Cheng, Y., et al. (2012). Sequence features and chromatin structure around the  
1051 genomic regions bound by 119 human transcription factors. *Genome Res.* 22, 1798–1812.
- 1052 Wang, L., Czedik-Eysenberg, A., Mertz, R.A., Si, Y., Tohge, T., Nunes-Nesi, A., Arrivault, S.,  
1053 Dedow, L.K., Bryant, D.W., Zhou, W., et al. (2014). Comparative analyses of C<sub>4</sub> and C<sub>3</sub>  
1054 photosynthesis in developing leaves of maize and rice. *Nat Biotech* 32, 1158–1165.
- 1055 Wickham, H. (2009). *ggplot2: elegant graphics for data analysis* (Springer New York).
- 1056 Williams, B.P., Burgess, S.J., Reyna-Llorens, I., Knerova, J., Aubry, S., Stanley, S., and Hibberd,  
1057 J.M. (2016). An untranslated cis-element regulates the accumulation of multiple C<sub>4</sub> enzymes in  
1058 Gynandropsis gynandra mesophyll cells. *Plant Cell* 28, 454–465.
- 1059 Xing, K., and He, X. (2015). Reassessing the “Duon” Hypothesis of Protein Evolution. *Mol. Biol.*  
1060 *Evol.* 32, 1056–1062.
- 1061 Xu, T., Purcell, M., Zucchi, P., Helentjaris, T., and Bogorad, L. (2001). TRM1, a YY1-like  
1062 suppressor of *rbcS-m3* expression in maize mesophyll cells. *Proc. Natl. Acad. Sci. U. S. A.* 98,  
1063 2295–2300.
- 1064 Zentner, G.E., and Henikoff, S. (2014). High-resolution digital profiling of the epigenome. *Nat Rev*  
1065 *Genet* 15, 814–827.
- 1066 Zhang, G., Liu, X., Quan, Z., Cheng, S., Xu, X., Pan, S., Xie, M., Zeng, P., Yue, Z., Wang, W., et  
1067 al. (2012a). Genome sequence of foxtail millet (*Setaria italica*) provides insights into grass  
1068 evolution and biofuel potential. *Nat Biotech* 30, 549–554.
- 1069 Zhang, W., Wu, Y., Schnable, J.C., Zeng, Z., Freeling, M., Crawford, G.E., and Jiang, J. (2012b).  
1070 High-resolution mapping of open chromatin in the rice genome. *Genome Res.* 22, 151–162.
- 1071 Zhu, L.J. (2013). Integrative Analysis of ChIP-Chip and ChIP-Seq Dataset BT - Tiling Arrays:  
1072 *Methods and Protocols*. T.-L. Lee, and A.C. Shui Luk, eds. (Totowa, NJ: Humana Press), pp. 105–  
1073 124.

- 1074 Zhu, L.J., Gazin, C., Lawson, N.D., Pagès, H., Lin, S.M., Lapointe, D.S., and Green, M.R. (2010a).  
1075 ChIPpeakAnno: a Bioconductor package to annotate ChIP-seq and ChIP-chip data. BMC  
1076 Bioinformatics *11*, 237.
- 1077 Zhu, X., Long, S., and Ort, D. (2010b). Improving Photosynthetic Efficiency for Greater Yield. Annu.  
1078 Rev. Plant Biol. *61*, 235–261.

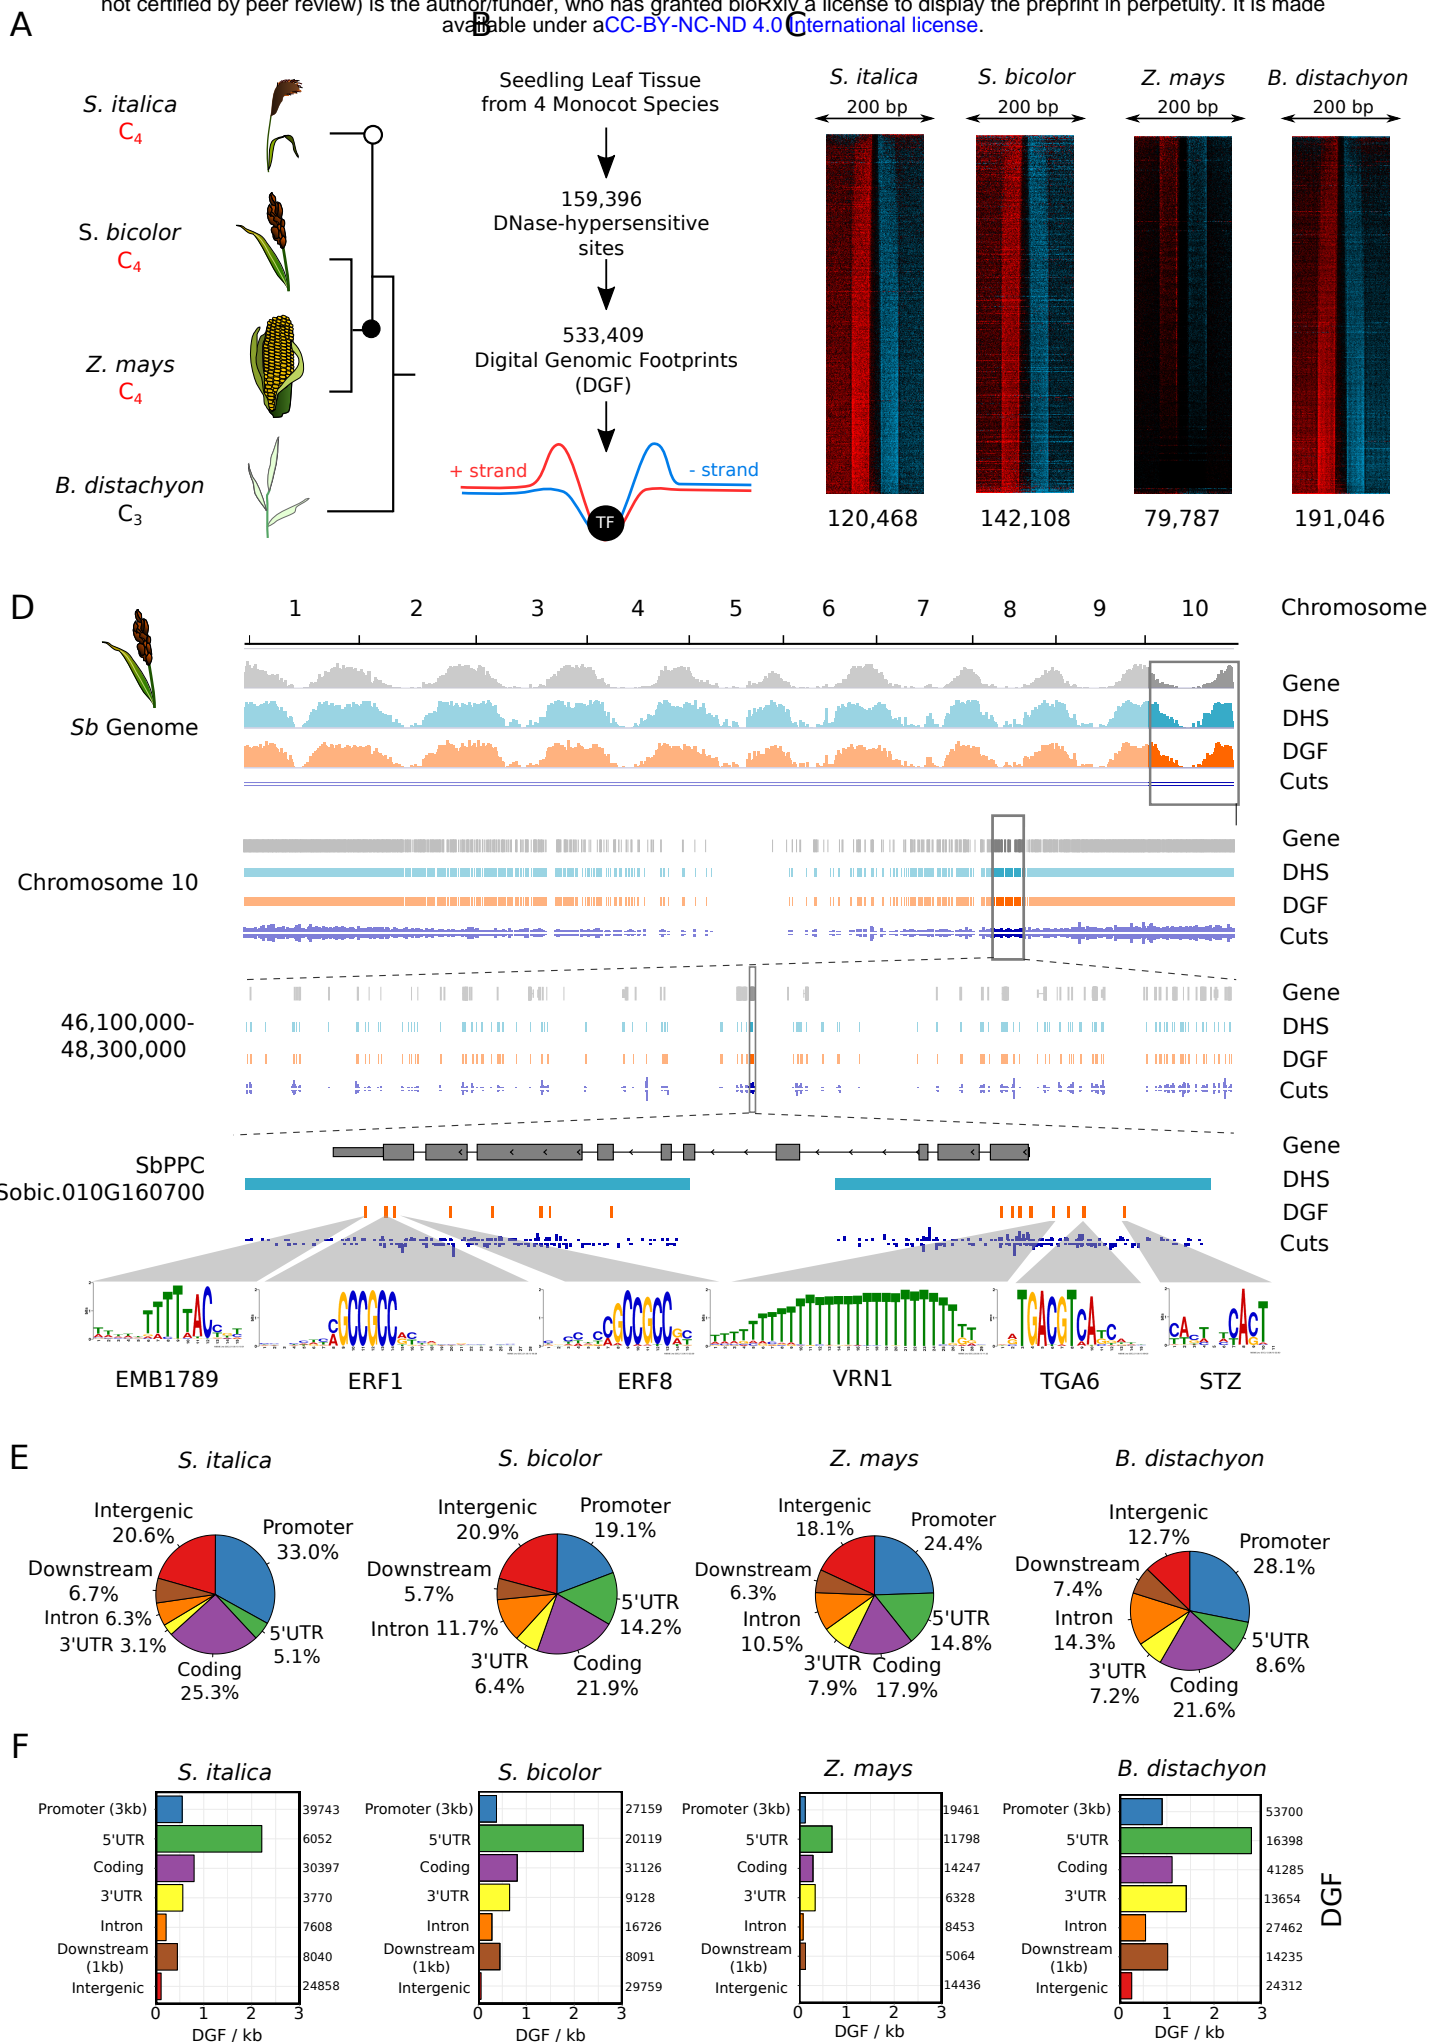

Figure 1







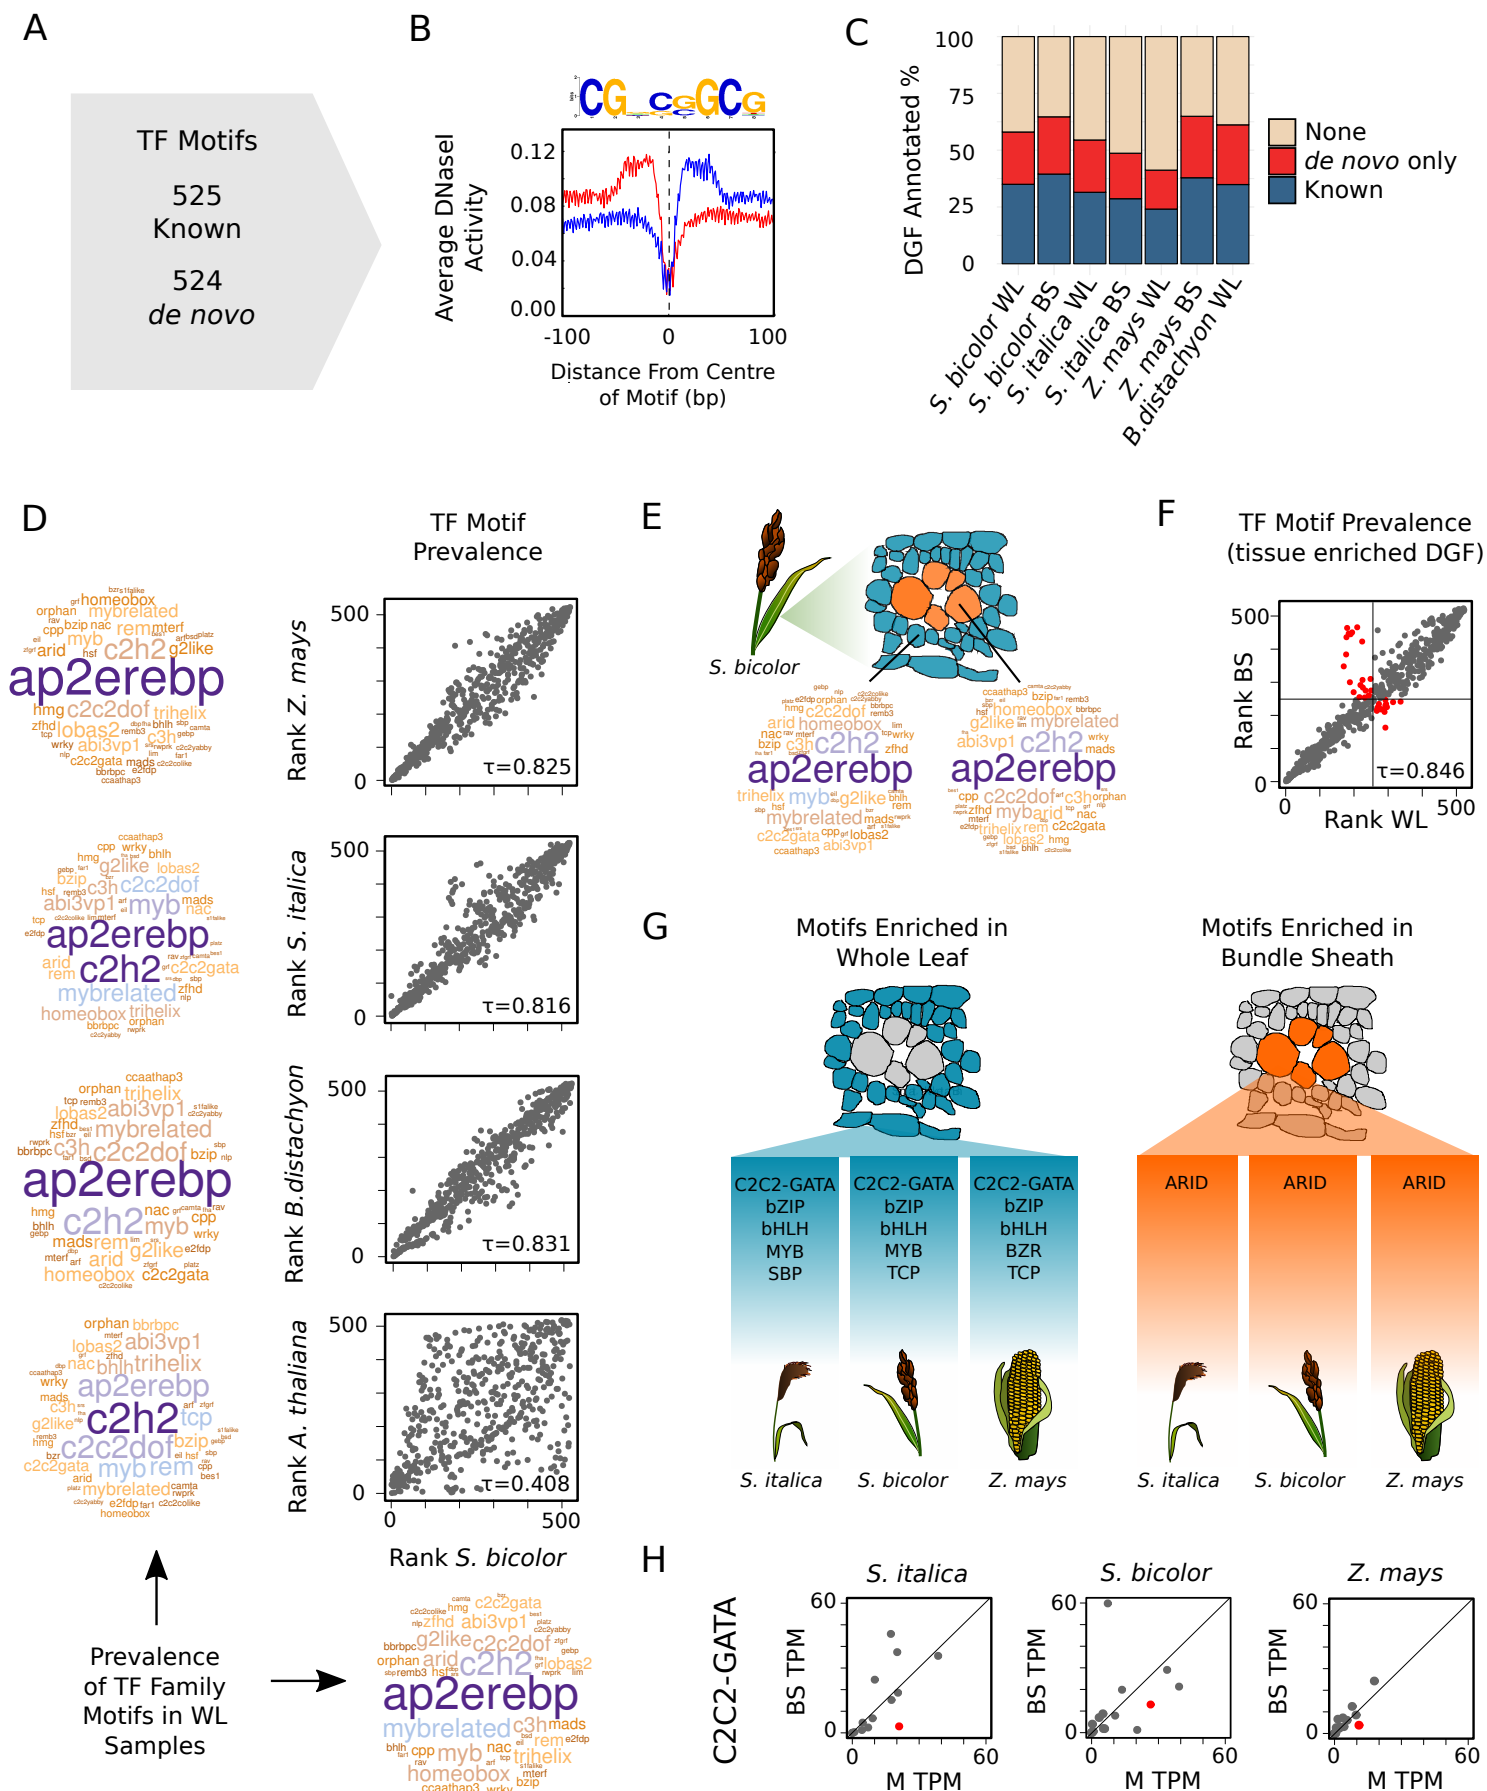

Figure 3

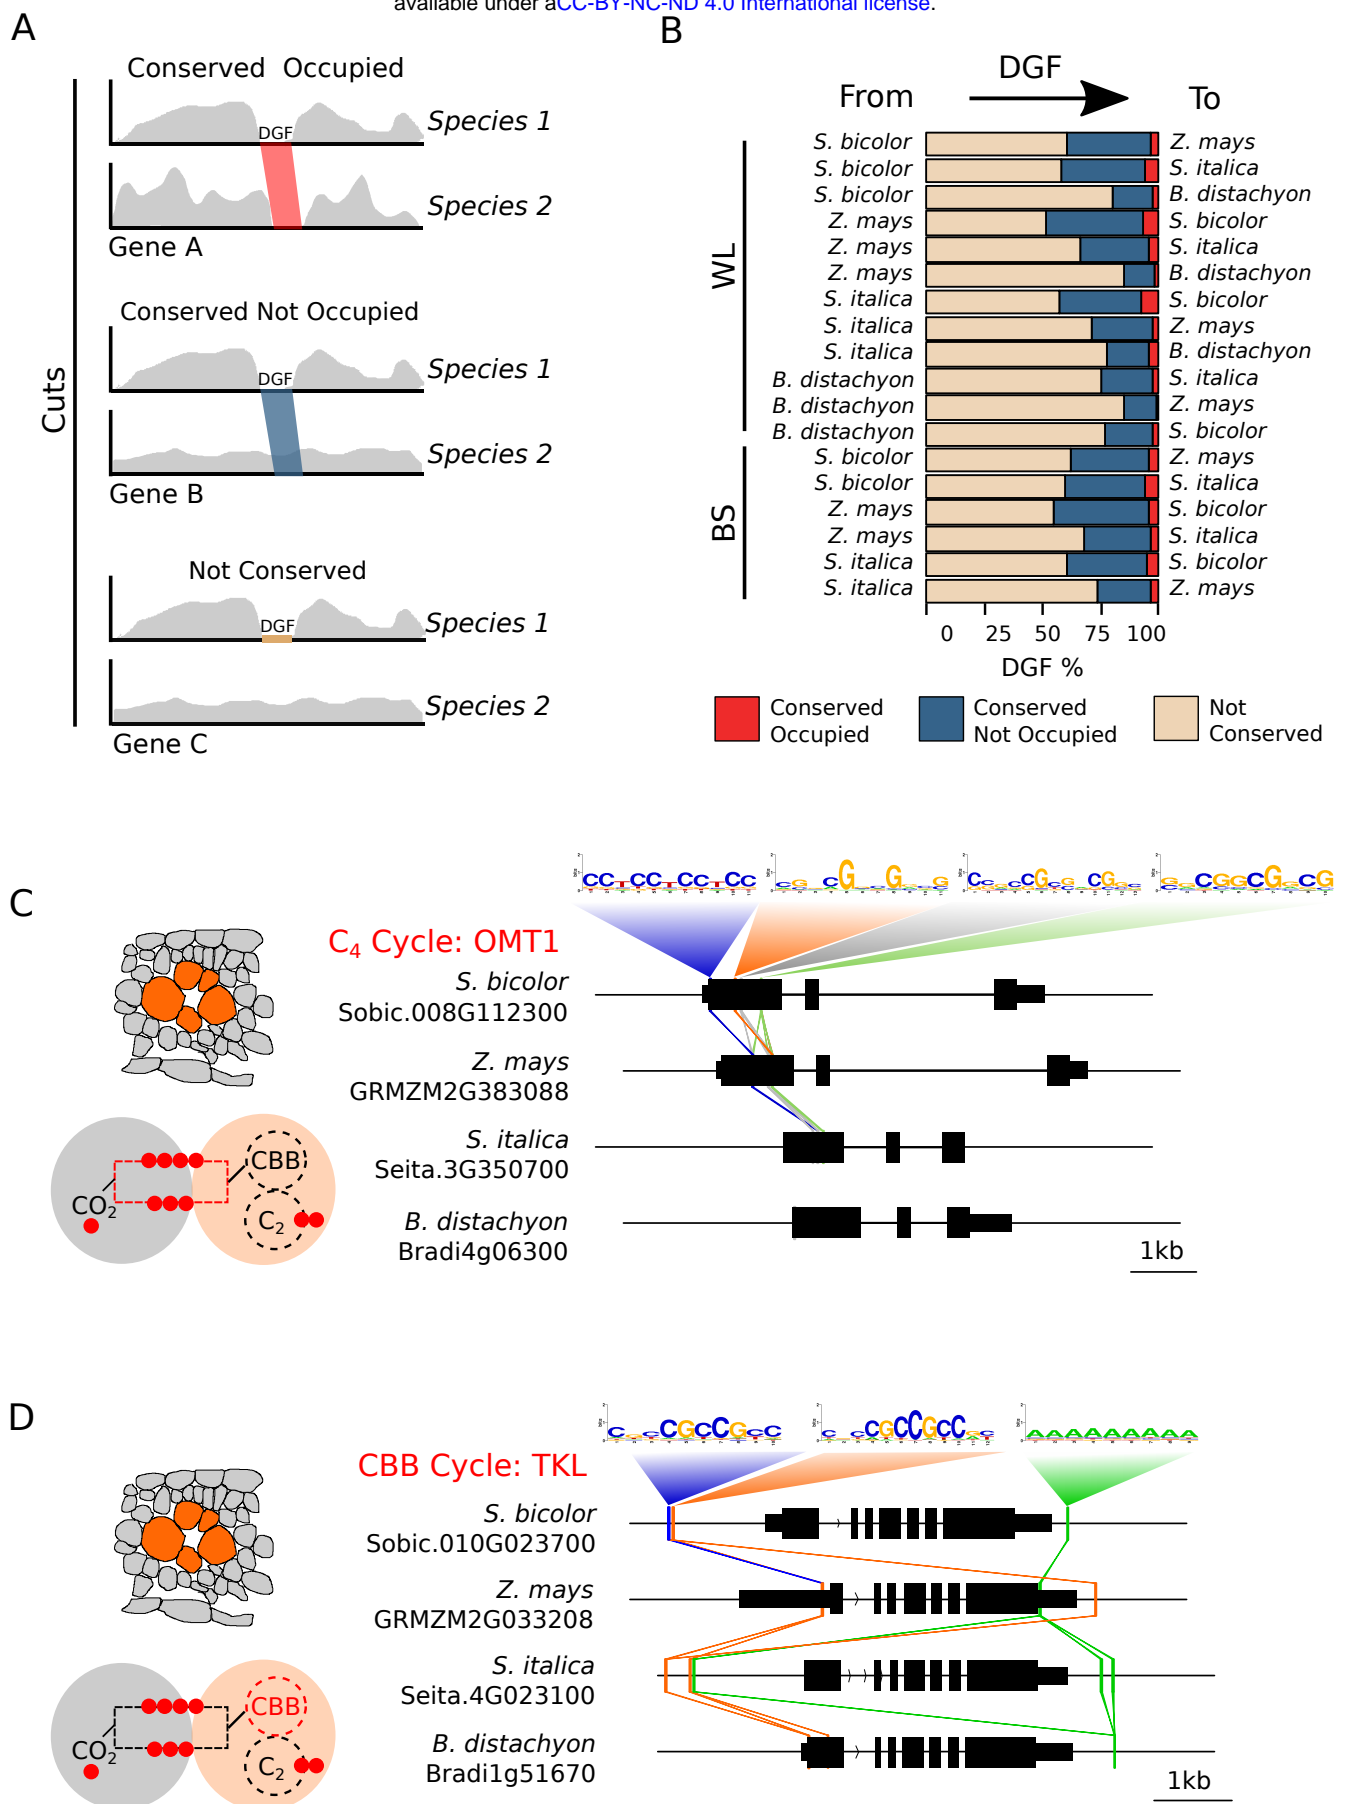

Figure 4

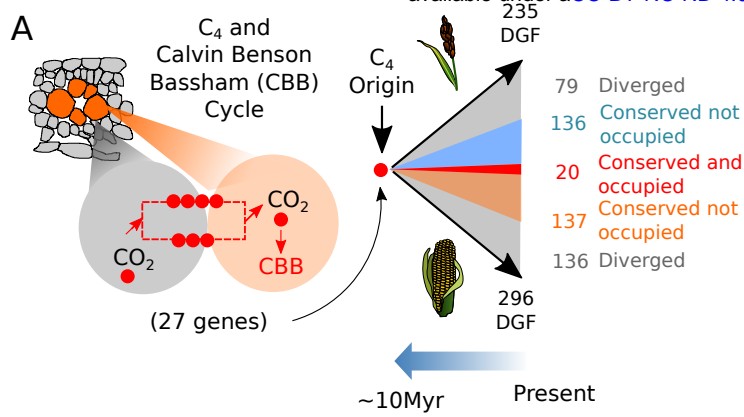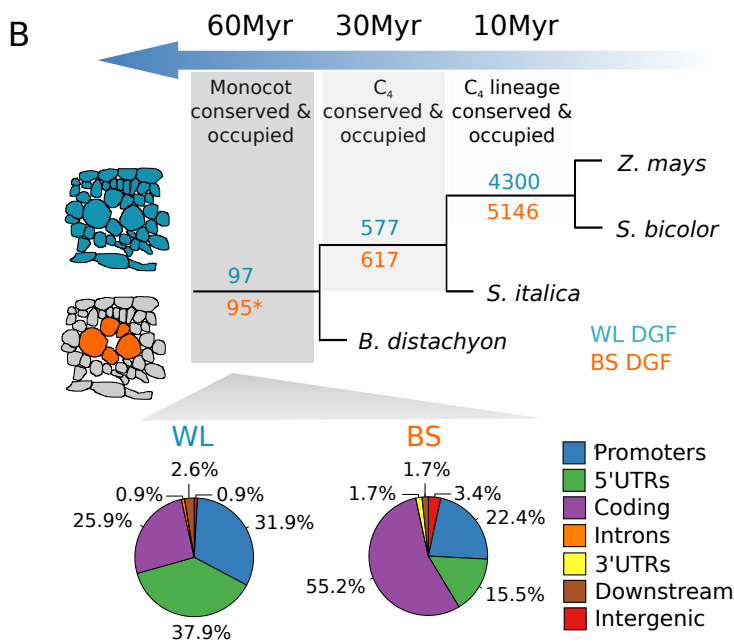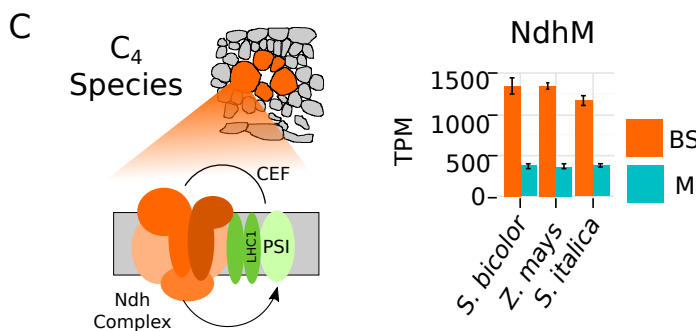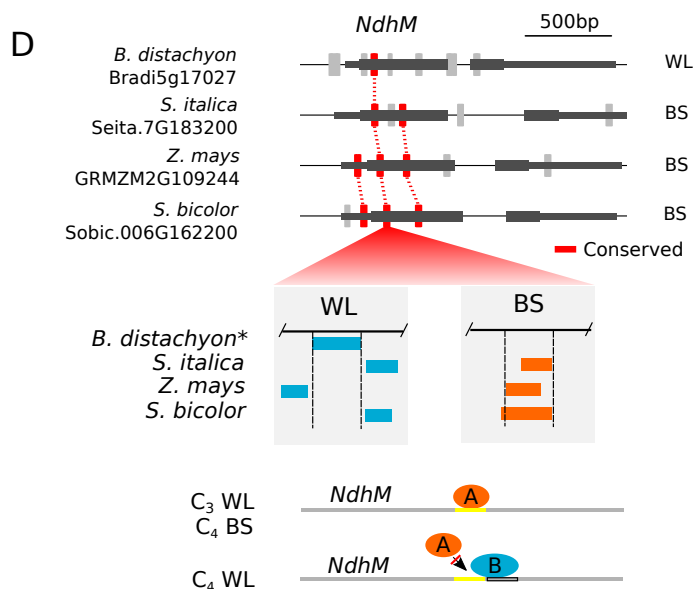

Figure 5
